# Supplementary material for: Genome diversity of marine phages recovered from Mediterranean metagenomes: Size matters
Source: PLoS Genet. 2017 Sep 25;13(9):e1007018. doi: 10.1371/journal.pgen.1007018 (PMC5628999; doi:10.1371/journal.pgen.1007018)
Supplement: S2 Table — (XLSX) [file pgen.1007018.s014.xlsx]

## Sheet: Hoja1
Table S2. Complete list of all phage contigs described in this study
Contig name	Length (bp)	Contig type	GC (%)	Host Domain	Host
1	Med-OCT2015-75m-C2049	11741	31.76	Bacteria	Alphaproteobacteria
1	Med-OCT2015-30m-C1243	13341	31.89	Bacteria	Alphaproteobacteria
1	Med-Io16-70mDCM-C121	15683	32.06	Bacteria	Alphaproteobacteria
1	Med-OCT2015-75m-C923	17433	32.25	Bacteria	Alphaproteobacteria
1	MedDCM-SEP2014-C613	19159	33.05	Bacteria	Alphaproteobacteria
1	MedDCM-OCT2015-60m-C189	34889	33.06	Bacteria	Alphaproteobacteria
1	Med-OCT2015-30m-C153	35645	33.1	Bacteria	Alphaproteobacteria
1	MedDCM-SEP2015_HS-C173	57441	33.15	Bacteria	Alphaproteobacteria
1	Med-OCT2015-30m-C403	22559	33.18	Bacteria	Alphaproteobacteria
1	Med-Io16-70mDCM-C45	24317	33.23	Bacteria	Alphaproteobacteria
1	MedDCM-OCT2015-60m-C133	41537	33.27	Bacteria	Alphaproteobacteria
1	MedDCM-SEP2014-C23	79181	33.31	Bacteria	Alphaproteobacteria
1	Med-Io7-77mDCM-C697	22829	33.36	Bacteria	Alphaproteobacteria
1	MedDCM-SEP2014-C398	24455	33.46	Bacteria	Alphaproteobacteria
1	Med-Io16-70mDCM-C64	20873	33.49	Bacteria	Alphaproteobacteria
1	MedDCM-SEP2015_HS-C115	68177	33.49	Bacteria	Alphaproteobacteria
1	Med-Io7-77mDCM-C956	34894	33.59	Bacteria	Alphaproteobacteria
1	Med-Io16-70mDCM-C5	58934	33.74	Bacteria	Alphaproteobacteria
1	MedDCM-SEP2014-C899	15973	33.76	Bacteria	Alphaproteobacteria
1	MedDCM-OCT2015-60m-C327	27279	33.82	Bacteria	Alphaproteobacteria
1	Med-OCT2015-30m-C50	55335	33.85	Bacteria	Alphaproteobacteria
1	Med-OCT2015-75m-C1711	12888	33.88	Bacteria	Alphaproteobacteria
1	Med-OCT2015-30m-C585	19061	34.27	Bacteria	Alphaproteobacteria
1	Med-Io16-70mDCM-C39	25849	34.35	Bacteria	Alphaproteobacteria
1	MedDCM-OCT2015-60m-C273	29132	34.41	Bacteria	Alphaproteobacteria
1	MedDCM-SEP2015_HS-C705	27889	34.47	Bacteria	Alphaproteobacteria
1	Med-OCT2015-75m-C1591	13350	35.59	Bacteria	Alphaproteobacteria
2	Med-OCT2015-15m-C3727	11426	31.69	Bacteria	SAR11
2	Med-SEP2014-30m-C2048	10137	32.84	Bacteria	SAR11
2	Med-OCT2015-30m-C255	27362	32.98	Bacteria	SAR11
2	Med-OCT2015-15m-C859	27240	33.3	Bacteria	SAR11
2	Med-OCT2015-30m-C546	19639	33.44	Bacteria	SAR11
2	Med-SEP2014-30m-C579	21176	33.47	Bacteria	SAR11
2	Med-OCT2015-15m-C1000	24790	33.48	Bacteria	SAR11
2	MedDCM-OCT2015-60m-C28	93140	33.51	Bacteria	SAR11
2	Med-SEP2014-30m-C629	20262	33.7	Bacteria	SAR11
2	Med-OCT2015-30m-C86	45227	33.82	Bacteria	SAR11
2	Med-OCT2015-30m-C1736	11331	33.88	Bacteria	SAR11
2	MedDCM-SEP2015_HS-C17	152096	33.92	Bacteria	SAR11
2	Med-SEP2014-30m-C654	19937	34.29	Bacteria	SAR11
2	Med-SEP2014-30m-C1771	11037	34.38	Bacteria	SAR11
2	MedDCM-OCT2015-60m-C225	31278	34.41	Bacteria	SAR11
2	Med-OCT2015-30m-C331	24654	34.41	Bacteria	SAR11
2	Med-OCT2015-15m-C2455	14687	34.51	Bacteria	SAR11
2	Med-SEP2014-30m-C449	25045	34.51	Bacteria	SAR11
2	Med-OCT2015-30m-C1257	13262	34.64	Bacteria	SAR11
2	MedDCM-OCT2015-60m-C1353	13262	34.65	Bacteria	SAR11
2	Med-OCT2015-15m-C1342	21184	36.36	Bacteria	SAR11
3	MedDCM-OCT2015-60m-C132	41636	36.4	Bacteria	Cyanobacteria
3	MedDCM-SEP2015_HS-C3276	12010	36.43	Bacteria	Cyanobacteria
3	Med-Io7-77mDCM-C2168	10576	36.64	Bacteria	Cyanobacteria
3	MedDCM-OCT2015-60m-C1469	12716	36.84	Bacteria	Cyanobacteria
3	Med-Ae1-75mDCM-C11	127314	37.04	Bacteria	Cyanobacteria
3	MedDCM-OCT2015-60m-C381	24738	37.04	Bacteria	Cyanobacteria
3	Med-Ae1-75mDCM-C67	30877	37.15	Bacteria	Cyanobacteria
3	MedDCM-SEP2015_HS-C3826	11016	37.28	Bacteria	Cyanobacteria
3	MedDCM-OCT2015-60m-C242	30651	37.54	Bacteria	Cyanobacteria
3	MedDCM-SEP2015_HS-C394	38100	37.55	Bacteria	Cyanobacteria
3	Med-Io7-77mDCM-C185	46659	37.59	Bacteria	Cyanobacteria
3	Med-Io7-77mDCM-C1274	13526	38.26	Bacteria	Cyanobacteria
3	Med-Io7-77mDCM-C1315	13261	38.34	Bacteria	Cyanobacteria
3	MedDCM-OCT2015-60m-C1648	11980	38.46	Bacteria	Cyanobacteria
3	MedDCM-SEP2015_HS-C2847	12957	38.46	Bacteria	Cyanobacteria
4	Med-OCT2015-15m-C2932	13258	33.11	Bacteria	SAR11
4	Med-SEP2014-15m-C2412	11447	33.33	Bacteria	SAR11
4	Med-SEP2014-30m-C649	20002	33.35	Bacteria	SAR11
4	Med-SEP2014-30m-C1577	11789	33.49	Bacteria	SAR11
4	Med-SEP2014-15m-C1034	18894	33.5	Bacteria	SAR11
4	Med-OCT2015-15m-C1503	19821	33.72	Bacteria	SAR11
4	Med-OCT2015-15m-C2714	13823	33.98	Bacteria	SAR11
4	Med-SEP2014-30m-C732	18740	34.01	Bacteria	SAR11
4	Med-OCT2015-15m-C551	33781	34.11	Bacteria	SAR11
4	Med-SEP2014-30m-C886	16742	34.18	Bacteria	SAR11
4	Med-Io16-70mDCM-C7	52513	34.21	Bacteria	SAR11
4	Med-Io16-70mDCM-C3	91799	34.3	Bacteria	SAR11
4	Med-SEP2014-30m-C223	35769	34.52	Bacteria	SAR11
4	Med-SEP2014-15m-C155	52069	34.83	Bacteria	SAR11
4	Med-OCT2015-15m-C642	30980	35.05	Bacteria	SAR11
5	MedDCM-SEP2015_HS-C711	27837	31.12	Bacteria	SAR11
5	MedDCM-SEP2013-C87	32442	31.27	Bacteria	SAR11
5	Med-OCT2015-30m-C466	21240	31.36	Bacteria	SAR11
5	MedDCM-SEP2015_HS-C4132	10524	31.43	Bacteria	SAR11
5	Med-OCT2015-30m-C1129	14027	31.6	Bacteria	SAR11
5	MedDCM-SEP2013-C56	37952	31.61	Bacteria	SAR11
5	MedDCM-SEP2015_HS-C2331	14475	32.08	Bacteria	SAR11
5	MedDCM-SEP2015_HS-C297	43764	32.71	Bacteria	SAR11
5	Med-OCT2015-30m-C283	26204	32.8	Bacteria	SAR11
5	MedDCM-SEP2013-C13	68578	32.82	Bacteria	SAR11
5	Med-OCT2015-30m-C393	22808	32.95	Bacteria	SAR11
5	Med-OCT2015-30m-C72	49617	33.08	Bacteria	SAR11
5	Med-Io7-77mDCM-C40	103430	33.11	Bacteria	SAR11
5	Med-OCT2015-30m-C843	16260	34.6	Bacteria	SAR11
5	MedDCM-SEP2013-C151	24375	35.72	Bacteria	SAR11
6	Med-OCT2015-30m-C363	23638	40.02	Bacteria	Cyanobacteria
6	MedDCM-SEP2014-C34	72345	41.67	Bacteria	Cyanobacteria
6	MedWinter-DEC2013-20m-C17	188424	42.26	Bacteria	Cyanobacteria
6	Med-SEP2014-30m-C1	188425	42.26	Bacteria	Cyanobacteria
6	MedDCM-SEP2014-C337	26504	42.47	Bacteria	Cyanobacteria
6	MedDCM-SEP2014-C90	46249	42.48	Bacteria	Cyanobacteria
6	MedWinter-JAN2015-CoastalC866	10043	42.57	Bacteria	Cyanobacteria
6	Med-OCT2015-30m-C1	164871	42.58	Bacteria	Cyanobacteria
6	MedDCM-SEP2014-C123	41065	42.79	Bacteria	Cyanobacteria
7	Med-OCT2015-90m-C950	16776	28.67	Bacteria	Cyanobacteria
7	MedDCM-SEP2015_HS-C1461	18848	29.14	Bacteria	Cyanobacteria
7	Med-OCT2015-75m-C912	17574	29.37	Bacteria	Cyanobacteria
7	Med-Io7-77mDCM-C885	16934	29.97	Bacteria	Cyanobacteria
7	MedDCM-OCT2015-60m-C1040	15126	30.31	Bacteria	Cyanobacteria
7	MedDCM-OCT2015-60m-C470	22707	31.83	Bacteria	Cyanobacteria
7	MedDCM-SEP2015_HS-C1166	21445	32.25	Bacteria	Cyanobacteria
7	MedDCM-SEP2015_HS-C265	46612	32.64	Bacteria	Cyanobacteria
7	MedDCM-OCT2015-60m-C172	36363	32.76	Bacteria	Cyanobacteria
8	Med-SEP2014-15m-C2199	12172	40.19	Bacteria
8	MedWinter-JAN2015-CoastalC215	21997	41.02	Bacteria
8	Med-SEP2014-30m-C511	22876	41.04	Bacteria
8	MedDCM-SEP2014-C773	17268	41.06	Bacteria
8	MedWinter-DEC2013-20m-C816	30244	41.69	Bacteria
8	MedWinter-JAN2015-80m-C706	11377	42.47	Bacteria
8	MedDCM-SEP2014-C912	15817	42.5	Bacteria
8	MedWinter-JAN2015-CoastalC709	11281	42.66	Bacteria
8	Med-SEP2014-30m-C1230	13733	42.9	Bacteria
9	Med-OCT2015-90m-C120	42435	29.34	Eukaryota	Pelagomonadales
9	MedDCM-SEP2015_HS-C127	65754	30.07	Eukaryota	Pelagomonadales
9	Med-OCT2015-90m-C66	51674	30.68	Eukaryota	Pelagomonadales
9	Med-OCT2015-75m-C5	148601	31.24	Eukaryota	Pelagomonadales
9	Med-OCT2015-90m-C566	21847	31.25	Eukaryota	Pelagomonadales
9	MedDCM-SEP2015_HS-C287	44363	32.09	Eukaryota	Pelagomonadales
9	MedDCM-SEP2015_HS-C397	38017	32.18	Eukaryota	Pelagomonadales
10	MedWinter-DEC2013-20m-C357	49224	33.63	Bacteria
10	Med-Io7-77mDCM-C784	23658	34.8	Bacteria
10	MedWinter-DEC2013-20m-C3133	12817	34.84	Bacteria
10	Med-Io16-70mDCM-C127	16523	34.97	Bacteria
10	Med-SEP2014-30m-C560	21638	35.04	Bacteria
10	Med-Io16-70mDCM-C319	15854	35.12	Bacteria
10	Med-Io7-77mDCM-C1337	13081	35.36	Bacteria
11	Med-OCT2015-15m-C1298	21559	31.59	Bacteria	Alphaproteobacteria
11	Med-OCT2015-15m-C81	76070	32.15	Bacteria	Alphaproteobacteria
11	MedWinter-DEC2013-20m-C4350	10152	32.38	Bacteria	Alphaproteobacteria
11	Med-SEP2014-15m-C12	142788	32.48	Bacteria	Alphaproteobacteria
11	MedWinter-DEC2013-20m-C3267	12514	33.96	Bacteria	Alphaproteobacteria
11	Med-OCT2015-30m-C1832	10996	34.37	Bacteria	Alphaproteobacteria
12	MedDCM-OCT2015-60m-C836	17045	32.65	Bacteria	SAR11
12	Med-OCT2015-15m-C2777	13637	32.68	Bacteria	SAR11
12	MedDCM-SEP2015_HS-C1076	22533	33.68	Bacteria	SAR11
12	MedDCM-SEP2014-C962	15341	34.13	Bacteria	SAR11
12	MedDCM-OCT2015-60m-C1084	14797	34.2	Bacteria	SAR11
12	Med-SEP2014-30m-C1457	12416	34.38	Bacteria	SAR11
13	MedDCM-SEP2015_HS-C2109	15265	34.29	Bacteria
13	Med-OCT2015-75m-C794	18900	34.88	Bacteria
13	MedDCM-JUL2012-C315	30990	35.85	Bacteria
13	MedDCM-JUL2012-C1612	11052	36.68	Bacteria
13	MedDCM-OCT2015-60m-C1867	11261	38.5	Bacteria
13	MedDCM-SEP2015_HS-C4493	10055	38.67	Bacteria
14	MedWinter-DEC2013-20m-C2351	15302	33	Bacteria	Cyanobacteria
14	Med-SEP2014-30m-C858	17138	33.63	Bacteria	Cyanobacteria
14	MedDCM-SEP2014-C159	38011	34.51	Bacteria	Cyanobacteria
14	Med-SEP2014-15m-C401	31806	35.29	Bacteria	Cyanobacteria
14	Med-SEP2014-30m-C515	22719	35.32	Bacteria	Cyanobacteria
14	MedWinter-DEC2013-20m-C1312	22674	35.6	Bacteria	Cyanobacteria
15	Med-OCT2015-30m-C443	21766	30.62	Bacteria
15	MedDCM-SEP2015_HS-C720	27660	31.49	Bacteria
15	Med-OCT2015-15m-C814	27757	31.83	Bacteria
15	MedDCM-OCT2015-60m-C184	35140	32.38	Bacteria
15	Med-SEP2014-30m-C566	21514	32.94	Bacteria
15	MedDCM-SEP2014-C546	20264	33.1	Bacteria
16	Med-SEP2014-30m-C1849	10798	30.98	Bacteria
16	MedDCM-SEP2015_HS-C2375	14309	32.41	Bacteria
16	Med-OCT2015-15m-C1882	17140	32.58	Bacteria
16	MedDCM-SEP2014-C1194	13393	32.68	Bacteria
16	MedDCM-OCT2015-60m-C1637	12011	32.94	Bacteria
17	Med-OCT2015-15m-C2523	14426	34.42	Bacteria	Cyanobacteria
17	Med-SEP2014-30m-C961	15986	34.91	Bacteria	Cyanobacteria
17	MedWinter-DEC2013-20m-C1970	17362	35.27	Bacteria	Cyanobacteria
17	Med-OCT2015-30m-C746	17362	35.28	Bacteria	Cyanobacteria
17	MedDCM-SEP2014-C765	17362	35.28	Bacteria	Cyanobacteria
18	Med-SEP2014-30m-C298	31312	33.64	Bacteria	Actinomarina
18	MedWinter-JAN2015-20m-LF-C85	25034	33.66	Bacteria	Actinomarina
18	MedDCM-SEP2014-C127	40771	34.07	Bacteria	Actinomarina
18	MedWinter-JAN2015-20m-LF-C264	13249	35.16	Bacteria	Actinomarina
18	MedWinter-JAN2015-80m-C831	10331	35.62	Bacteria	Actinomarina
19	MedWinter-DEC2013-20m-C1828	18258	37.11	Bacteria	Cyanobacteria
19	Med-SEP2014-30m-C251	34105	37.14	Bacteria	Cyanobacteria
19	MedDCM-SEP2014-C203	34406	37.18	Bacteria	Cyanobacteria
19	Med-SEP2014-15m-C2143	12327	37.37	Bacteria	Cyanobacteria
19	MedDCM-SEP2014-C1712	10749	37.45	Bacteria	Cyanobacteria
20	Med-OCT2015-30m-C1386	12647	34.08	Bacteria
20	MedWinter-DEC2013-20m-C3379	12246	34.12	Bacteria
20	MedWinter-DEC2013-20m-C2405	15123	34.14	Bacteria
20	Med-OCT2015-30m-C2110	10219	34.83	Bacteria
20	Med-SEP2014-30m-C1272	13396	35.19	Bacteria
21	Med-SEP2014-30m-C18	105657	35.18	Bacteria
21	Med-SEP2014-15m-C36	93924	35.53	Bacteria
21	Med-OCT2015-15m-C67	80341	35.57	Bacteria
21	Med-OCT2015-30m-C498	20502	36.15	Bacteria
21	MedDCM-SEP2014-C1224	13135	36.97	Bacteria
22	MedDCM-SEP2015_HS-C481	34213	36.25	Bacteria	Cyanobacteria
22	MedDCM-OCT2015-60m-C4	196757	37.71	Bacteria	Cyanobacteria
22	MedDCM-SEP2014-C2	196733	37.71	Bacteria	Cyanobacteria
22	MedDCM-SEP2015_HS-C191	54747	38.06	Bacteria	Cyanobacteria
22	MedDCM-SEP2015_HS-C2101	15285	38.13	Bacteria	Cyanobacteria
23	Med-Io16-70mDCM-C249	10924	34.65	Bacteria	Cyanobacteria
23	MedDCM-SEP2015_HS-C2787	13095	34.88	Bacteria	Cyanobacteria
23	Med-Io7-77mDCM-C776	18356	35.56	Bacteria	Cyanobacteria
23	Med-Io16-70mDCM-C261	10632	35.96	Bacteria	Cyanobacteria
24	MedWinter-DEC2013-20m-C714	32784	37.8	Bacteria	Cyanobacteria
24	MedDCM-SEP2014-C222	32408	37.81	Bacteria	Cyanobacteria
24	Med-SEP2014-30m-C277	32657	37.83	Bacteria	Cyanobacteria
24	Med-SEP2014-15m-C564	26023	38.09	Bacteria	Cyanobacteria
25	Med-OCT2015-90m-C2437	10221	35.22	Bacteria
25	Med-OCT2015-75m-C375	28395	35.91	Bacteria
25	Med-OCT2015-90m-C1362	13878	36.71	Bacteria
25	Med-OCT2015-90m-C75	49962	36.92	Bacteria
26	Med-OCT2015-90m-C703	19423	34.82	Bacteria
26	Med-OCT2015-75m-C1262	14974	35.55	Bacteria
26	MedDCM-JUL2012-C1439	16663	36.57	Bacteria
26	MedDCM-SEP2015_HS-C2411	14177	36.62	Bacteria
27	Med-Io16-70mDCM-C148	14000	36.89	Bacteria
27	Med-Io7-77mDCM-C1221	21991	37.74	Bacteria
27	Med-Io16-70mDCM-C132	14830	37.88	Bacteria
27	Med-Io7-77mDCM-C2068	19047	37.96	Bacteria
28	Med-OCT2015-30m-C852	16166	36.55	Bacteria
28	Med-SEP2014-30m-C189	39464	37.11	Bacteria
28	Med-OCT2015-15m-C1092	23615	37.12	Bacteria
28	Med-SEP2014-15m-C695	23615	37.12	Bacteria
29	MedDCM-SEP2013-C294	16444	35.19	Bacteria	Cyanobacteria
29	MedDCM-SEP2013-LF-C5	15144	35.22	Bacteria	Cyanobacteria
29	MedDCM-SEP2013-C1	130495	35.74	Bacteria	Cyanobacteria
29	MedDCM-JUL2012-C7	154128	35.94	Bacteria	Cyanobacteria
30	MedDCM-OCT2015-60m-C295	28404	32.62	Bacteria
30	Med-SEP2014-30m-C780	18008	32.75	Bacteria
30	Med-OCT2015-30m-C388	22921	32.77	Bacteria
30	MedDCM-SEP2014-C433	23467	32.79	Bacteria
31	Med-OCT2015-90m-C1283	14280	31.66	Bacteria
31	MedDCM-JUL2012-C1169	12216	32.03	Bacteria
31	Med-OCT2015-75m-C2226	11259	32.21	Bacteria
31	MedDCM-OCT2015-60m-C1951	11025	32.24	Bacteria
32	Med-Io7-77mDCM-C2247	11320	32.59	Bacteria	Cyanobacteria
32	Med-Ae2-600mDeep-C1059	10368	32.79	Bacteria	Cyanobacteria
32	Med-Ae1-75mDCM-C104	24458	32.85	Bacteria	Cyanobacteria
32	Med-OCT2015-75m-C1324	14643	33.05	Bacteria
33	MedDCM-SEP2014-C320	27038	35.29	Bacteria	Cyanobacteria
33	MedDCM-SEP2013-C63	36255	36.4	Bacteria	Cyanobacteria
33	MedDCM-SEP2013-C191	20902	39.11	Bacteria	Cyanobacteria
33	MedDCM-SEP2014-C1571	11313	39.72	Bacteria	Cyanobacteria
34	MedDCM-SEP2015_HS-C2221	14908	36.5	Bacteria
34	Med-OCT2015-75m-C455	25285	36.99	Bacteria
34	Med-Io7-77mDCM-C1480	14801	37	Bacteria
34	MedDCM-SEP2015_HS-C1061	22660	37.02	Bacteria
35	MedWinter-JAN2015-80m-C826	10365	40.12	Bacteria
35	MedWinter-DEC2013-20m-C1414	21580	41.39	Bacteria
35	Med-OCT2015-30m-C1596	11828	41.67	Bacteria
35	MedDCM-SEP2014-C670	18326	41.79	Bacteria
36	MedWinter-DEC2013-20m-C148	75809	36.47	Bacteria
36	Med-OCT2015-15m-C119	63337	36.85	Bacteria
36	Med-SEP2014-30m-C72	63313	36.85	Bacteria
36	Med-SEP2014-15m-C116	59999	36.89	Bacteria
37	Med-OCT2015-90m-C305	29283	29.81	Eukaryota	Pelagomonadales
37	Med-OCT2015-75m-C9	127348	30.7	Eukaryota	Pelagomonadales
37	MedDCM-SEP2015_HS-C12	163529	30.85	Eukaryota	Pelagomonadales
37	Med-OCT2015-75m-C223	36891	31.54	Eukaryota	Pelagomonadales
38	Med-OCT2015-30m-C410	22477	38.94	Bacteria	Cyanobacteria
38	MedDCM-SEP2014-C17	88864	39.52	Bacteria	Cyanobacteria
38	Med-OCT2015-30m-C766	17077	39.67	Bacteria	Cyanobacteria
38	Med-OCT2015-30m-C1863	10889	40.39	Bacteria	Cyanobacteria
39	MedDCM-SEP2015_HS-C471	34608	33.58	Bacteria
39	Med-OCT2015-90m-C430	25043	33.91	Bacteria
39	Med-OCT2015-90m-C223	33386	34.44	Bacteria
39	Med-OCT2015-75m-C89	55505	34.81	Bacteria
40	Med-OCT2015-15m-C935	26018	36.83	Bacteria
40	Med-SEP2014-30m-C94	54438	37.15	Bacteria
40	Med-OCT2015-15m-C679	30237	37.37	Bacteria
40	Med-OCT2015-30m-C1696	11445	39.17	Bacteria
41	MedDCM-SEP2014-C73	50070	36.73	Bacteria	Cyanobacteria
41	MedDCM-SEP2013-C210	19937	36.83	Bacteria	Cyanobacteria
41	MedDCM-SEP2013-C390	14272	38.78	Bacteria	Cyanobacteria
42	Med-Io16-70mDCM-C23	31472	36.81	Bacteria	Cyanobacteria
42	Med-Io16-70mDCM-C20	65403	37.18	Bacteria	Cyanobacteria
42	Med-Io7-77mDCM-C19	131009	37.22	Bacteria	Cyanobacteria
43	Med-OCT2015-2000m-C1132	25404	39.69	Bacteria	Oscillatoriales
43	Med-OCT2015-1000m-C826	15503	40.37	Bacteria	Oscillatoriales
43	Med-OCT2015-2000m-C2045	17163	40.66	Bacteria	Oscillatoriales
44	Med-Io16-70mDCM-C320	21291	31.6	Bacteria
44	Med-Io16-70mDCM-C328	23046	32.34	Bacteria
44	Med-Ae1-75mDCM-C31	61451	32.8	Bacteria
45	Med-OCT2015-90m-C2087	11135	36.44	Bacteria
45	Med-OCT2015-75m-C1697	12939	36.61	Bacteria
45	MedDCM-SEP2015_HS-C3011	12563	36.9	Bacteria
46	Med-OCT2015-75m-C288	32966	29.5	Eukaryota	Pelagomonadales
46	MedDCM-SEP2015_HS-C531	32364	29.56	Eukaryota	Pelagomonadales
46	Med-OCT2015-90m-C252	31650	29.61	Eukaryota	Pelagomonadales
47	Med-SEP2014-30m-C100	53307	37.26	Bacteria
47	MedDCM-OCT2015-60m-C19	105202	37.29	Bacteria
47	Med-Io16-70mDCM-C1	103655	37.4	Bacteria
48	MedDCM-OCT2015-60m-C1234	13923	32.49	Bacteria
48	Med-OCT2015-30m-C2128	10177	32.58	Bacteria
48	MedDCM-SEP2014-C669	18337	32.62	Bacteria
49	Med-OCT2015-30m-C1974	10622	33.39	Bacteria
49	MedDCM-OCT2015-60m-C2034	10812	34.39	Bacteria
49	MedWinter-DEC2013-20m-C4391	10094	34.59	Bacteria
50	Med-OCT2015-90m-C191	35290	29.07	Eukaryota	Pelagomonadales
50	Med-OCT2015-75m-C208	38194	29.65	Eukaryota	Pelagomonadales
50	MedDCM-SEP2015_HS-C381	38536	29.74	Eukaryota	Pelagomonadales
51	Med-OCT2015-15m-C971	25338	36.37	Bacteria
51	Med-SEP2014-15m-C341	34685	36.41	Bacteria
51	Med-OCT2015-30m-C159	34870	36.43	Bacteria
52	MedDCM-SEP2015_HS-C2776	13111	35.74	Eukaryota	Pelagomonadales
52	Med-OCT2015-90m-C902	17340	35.96	Eukaryota	Pelagomonadales
52	Med-OCT2015-75m-C947	17163	36.08	Eukaryota	Pelagomonadales
53	MedDCM-SEP2014-C1921	10078	27.95	Bacteria	Cyanobacteria
53	Med-OCT2015-30m-C1074	14342	29.69	Bacteria	Cyanobacteria
53	Med-SEP2014-30m-C1233	13712	32.77	Bacteria	Cyanobacteria
54	Med-OCT2015-90m-C1553	12983	39	Bacteria	Cyanobacteria
54	MedDCM-SEP2015_HS-C3196	12163	39.25	Bacteria	Cyanobacteria
54	Med-OCT2015-75m-C2655	10256	39.81	Bacteria	Cyanobacteria
55	Med-SEP2014-30m-C1129	14481	39.92	Bacteria
55	Med-OCT2015-30m-C1721	11374	40.29	Bacteria
55	Med-OCT2015-15m-C3753	11374	40.3	Bacteria
56	Med-OCT2015-15m-C1367	20921	39.52	Bacteria	Cyanobacteria
56	Med-OCT2015-30m-C69	49973	39.8	Bacteria	Cyanobacteria
56	Med-OCT2015-15m-C1658	18628	40.18	Bacteria	Cyanobacteria
57	MedWinter-DEC2013-20m-C2631	14298	36.26	Bacteria	Cyanobacteria
57	Med-SEP2014-15m-C65	76344	37.58	Bacteria	Cyanobacteria
57	MedWinter-DEC2013-20m-C593	36467	38.84	Bacteria	Cyanobacteria
58	Med-OCT2015-75m-C536	23114	35.01	Eukaryota	Pelagomonadales
58	MedDCM-SEP2015_HS-C783	26436	35.66	Eukaryota	Pelagomonadales
58	Med-OCT2015-90m-C1279	14308	36.36	Eukaryota	Pelagomonadales
59	Med-Io16-70mDCM-C152	13739	35.15	Bacteria
59	Med-Io7-77mDCM-C1137	14655	35.16	Bacteria
59	Med-Io7-77mDCM-C571	21440	35.37	Bacteria
60	MedWinter-DEC2013-20m-C2628	14304	32.38	Bacteria
60	MedWinter-JAN2015-CoastalC242	20746	35.04	Bacteria
60	MedWinter-DEC2013-20m-C2701	14063	35.55	Bacteria
61	Med-OCT2015-90m-C1221	14629	35.99	Bacteria
61	MedDCM-SEP2015_HS-C1400	19344	36.11	Bacteria
61	Med-OCT2015-75m-C542	23049	36.64	Bacteria
62	Med-SEP2014-15m-C425	31188	38.28	Bacteria	Cyanobacteria
62	MedWinter-DEC2013-20m-C160	74096	39.16	Bacteria	Cyanobacteria
62	Med-SEP2014-15m-C286	37888	39.67	Bacteria	Cyanobacteria
63	Med-SEP2014-15m-C1790	13712	31.67	Bacteria
63	Med-OCT2015-30m-C1187	13628	31.96	Bacteria
63	Med-SEP2014-30m-C124	48794	32.77	Bacteria
64	MedDCM-SEP2014-C1392	12244	36.43	Bacteria	Cyanobacteria
64	MedWinter-DEC2013-20m-C3252	12552	36.64	Bacteria	Cyanobacteria
64	Med-SEP2014-30m-C823	17544	37.78	Bacteria	Cyanobacteria
65	MedDCM-SEP2015_HS-C3269	12021	34.55	Bacteria
65	Med-OCT2015-90m-C2468	10162	35.04	Bacteria
65	Med-Io7-77mDCM-C445	24910	35.21	Bacteria
66	Med-Ae1-75mDCM-C319	10838	35.99	Bacteria	Cyanobacteria
66	Med-OCT2015-75m-C678	20485	36.11	Bacteria	Cyanobacteria
66	Med-OCT2015-90m-C1916	11604	36.64	Bacteria	Cyanobacteria
67	Med-OCT2015-75m-C197	39142	36.23	Bacteria
67	Med-OCT2015-90m-C27	69009	36.72	Bacteria
67	Med-OCT2015-75m-C520	23425	37.22	Bacteria
68	Med-OCT2015-75m-C78	60245	34.03	Bacteria
68	Med-OCT2015-90m-C1292	14213	36.78	Bacteria
69	Med-SEP2014-15m-C1007	19159	39.28	Bacteria	SAR116
69	Med-OCT2015-15m-C508	34924	39.48	Bacteria	SAR116
70	Med-Ae1-75mDCM-C306	11146	33.61	Bacteria
70	Med-Io16-70mDCM-C213	11678	33.9	Bacteria
71	Med-OCT2015-15m-C3819	11254	34.53	Bacteria
71	Med-OCT2015-30m-C1659	11603	34.6	Bacteria
72	MedDCM-SEP2015_HS-C4159	10490	37.04	Bacteria
72	Med-OCT2015-75m-C2390	10796	37.19	Bacteria
73	MedDCM-SEP2013-C391	14265	40.82	Bacteria	Cyanobacteria
73	MedDCM-SEP2014-C1554	11382	40.99	Bacteria
74	Med-Io16-70mDCM-C185	14913	36.04	Bacteria
74	Med-Io7-77mDCM-C1153	14560	36.2	Bacteria
75	Med-OCT2015-75m-C2083	11640	35.97	Bacteria
75	Med-OCT2015-90m-C979	16576	36.23	Bacteria
76	MedDCM-SEP2014-C1383	12274	39.69	Bacteria
76	Med-SEP2014-30m-C1474	12320	39.88	Bacteria
77	MedWinter-JAN2015-20m-LF-C325	11684	40.65	Bacteria
77	MedWinter-JAN2015-80m-C125	30643	40.69	Bacteria
78	MedDCM-OCT2015-60m-C1068	14888	34.6	Bacteria
78	Med-OCT2015-30m-C831	16462	34.67	Bacteria
79	MedDCM-OCT2015-60m-C1158	14368	31.67	Bacteria	Proteobacteria
79	Med-OCT2015-15m-C4058	10806	31.31	Bacteria
80	Med-SEP2014-30m-C1140	14369	39.49	Bacteria
80	MedDCM-SEP2014-C339	26408	40.04	Bacteria
81	Med-OCT2015-30m-C1228	13429	38.55	Bacteria
81	Med-SEP2014-30m-C1260	13457	38.57	Bacteria
82	MedDCM-SEP2014-C737	17629	35.95	Bacteria
82	MedDCM-OCT2015-60m-C1228	13968	36.08	Bacteria
83	Med-OCT2015-15m-C745	28824	31.5	Bacteria
83	Med-OCT2015-30m-C2195	10020	32.05	Bacteria
84	Med-SEP2014-30m-C720	18909	36.17	Bacteria
84	Med-OCT2015-30m-C698	17779	37.67	Bacteria
85	MedDCM-SEP2015_HS-C3065	12442	33.19	Bacteria	Cyanobacteria
85	MedDCM-OCT2015-60m-C586	20506	34.41	Bacteria
86	Med-OCT2015-15m-C958	25463	33.3	Bacteria
86	Med-SEP2014-30m-C388	27578	33.52	Bacteria
87	MedDCM-SEP2014-C70	51688	40.01	Bacteria	Cyanobacteria
87	Med-OCT2015-30m-C1255	13275	40.17	Bacteria	Cyanobacteria
88	Med-SEP2014-30m-C293	31644	31.43	Bacteria
88	MedDCM-SEP2014-C459	22684	32.42	Bacteria
89	Med-OCT2015-75m-C800	18821	35.07	Bacteria
89	Med-OCT2015-90m-C1459	13377	35.93	Bacteria
90	Med-OCT2015-30m-C34	63844	32.47	Bacteria	SAR11
90	Med-OCT2015-15m-C148	58094	32.57	Bacteria	SAR11
91	Med-OCT2015-30m-C1281	13151	32.53	Bacteria	SAR11
91	MedDCM-SEP2014-C1847	10264	33.29	Bacteria	SAR11
92	Med-OCT2015-75m-C754	19466	39.02	Bacteria
92	MedDCM-SEP2015_HS-C2843	12969	39.19	Bacteria
93	Med-OCT2015-30m-C178	32944	35.39	Bacteria
93	Med-SEP2014-30m-C394	27318	35.63	Bacteria
94	Med-OCT2015-30m-C689	17865	35.64	Bacteria
94	Med-OCT2015-15m-C3636	11597	35.83	Bacteria
95	Med-SEP2014-30m-C1707	11295	33.98	Bacteria
95	Med-OCT2015-30m-C353	23932	33.99	Bacteria
96	Med-SEP2014-30m-C1479	12268	32.62	Bacteria
96	Med-OCT2015-30m-C305	25408	33.79	Bacteria
97	Med-SEP2014-30m-C741	18633	38.79	Bacteria
97	Med-SEP2014-15m-C1514	15148	39	Bacteria
98	MedDCM-SEP2013-C80	33498	34.64	Bacteria	Cyanobacteria
98	MedDCM-SEP2014-C450	22965	35.29	Bacteria
99	MedDCM-SEP2015_HS-C2695	13268	33.89	Bacteria
99	Med-OCT2015-75m-C2007	11863	34.12	Bacteria
100	Med-OCT2015-15m-C3603	11659	35.83	Bacteria
100	Med-SEP2014-15m-C2116	12408	36.39	Bacteria
101	Med-OCT2015-15m-C65	80390	31.93	Bacteria
101	Med-OCT2015-30m-C18	80382	31.94	Bacteria
102	MedWinter-JAN2015-20m-LF-C42	33758	49.37	Bacteria
102	MedWinter-JAN2015-80m-C86	37175	49.43	Bacteria
103	Med-OCT2015-2000m-C702	34847	38.43	Bacteria	Oscillatoriales
103	Med-OCT2015-1000m-C527	19899	38.45	Bacteria	Oscillatoriales
104	Med-SEP2014-30m-C1693	11339	36.82	Bacteria
104	Med-OCT2015-15m-C4206	10596	38.07	Bacteria
105	Med-OCT2015-30m-C366	23546	31.07	Bacteria
105	MedDCM-OCT2015-60m-C24	95347	32.09	Bacteria
106	Med-Ae2-600mDeep-C331	21078	30.81	Bacteria
106	Med-OCT2015-90m-C56	54113	32.27	Bacteria
107	Med-SEP2014-30m-C533	22191	35.27	Bacteria
107	Med-OCT2015-30m-C1645	11660	35.33	Bacteria
108	Med-Io16-70mDCM-C27	30302	30.59	Bacteria
108	Med-Io7-77mDCM-C305	30923	30.7	Bacteria
109	Med-OCT2015-30m-C116	39525	34.07	Bacteria
109	Med-Io16-70mDCM-C205	11992	35.72	Bacteria
110	MedDCM-SEP2014-C94	45846	38.77	Bacteria
110	MedDCM-SEP2013-C188	20994	39.2	Bacteria
111	Med-Io7-77mDCM-C1115	23128	37.97	Bacteria
111	Med-Io16-70mDCM-C235	11197	39.05	Bacteria
112	Med-SEP2014-30m-C422	26193	33.57	Bacteria
112	Med-Io16-70mDCM-C22	32062	34.1	Bacteria
113	Med-SEP2014-30m-C709	19074	36.92	Bacteria
113	Med-OCT2015-30m-C35	62840	37.32	Bacteria
114	MedDCM-SEP2014-C1569	11324	33.13	Bacteria
114	MedDCM-SEP2015_HS-C1854	16412	34.13	Bacteria
115	MedDCM-OCT2015-60m-C370	25145	36.36	Bacteria	Cyanobacteria
115	MedDCM-JUL2012-C1264	16309	36.88	Bacteria	Cyanobacteria
116	Med-Io16-70mDCM-C78	19293	35.1	Bacteria	Cyanobacteria
116	Med-Ae1-75mDCM-C219	14289	35.17	Bacteria	Cyanobacteria
117	Med-OCT2015-30m-C378	23115	36.12	Bacteria
117	Med-SEP2014-30m-C516	22655	36.52	Bacteria
118	Med-SEP2014-15m-C1992	12853	36.51	Bacteria
118	Med-SEP2014-30m-C946	16080	37.73	Bacteria
119	Med-OCT2015-2000m-C1031	27013	40.9	Bacteria	Oscillatoriales
119	Med-OCT2015-1000m-C1566	10933	41.83	Bacteria	Oscillatoriales
120	MedDCM-OCT2015-60m-C380	24740	36.6	Bacteria
120	MedDCM-SEP2015_HS-C676	28559	36.79	Bacteria
121	MedDCM-SEP2014-C465	22562	31.8	Bacteria
121	Med-OCT2015-30m-C963	15122	32.01	Bacteria
122	MedDCM-SEP2013-C264	17235	37.27	Bacteria	Cyanobacteria
122	MedDCM-JUL2012-C367	25077	38.25	Bacteria	Cyanobacteria
123	MedDCM-SEP2014-C177	36074	38.7	Bacteria	Cyanobacteria
123	MedDCM-SEP2013-C289	16556	39.14	Bacteria	Cyanobacteria
124	Med-OCT2015-30m-C1507	12183	29.8	Bacteria
124	Med-SEP2014-15m-C636	24645	30.26	Bacteria
125	MedDCM-SEP2015_HS-C4491	10059	45.82	Bacteria
125	Med-OCT2015-75m-C256	34778	46.27	Bacteria
126	Med-SEP2014-30m-C1685	11382	37.03	Bacteria
126	MedDCM-SEP2014-C1555	11382	37.03	Bacteria
127	MedWinter-DEC2013-20m-C4101	10622	32.3	Bacteria
127	Med-SEP2014-30m-C1641	11547	32.39	Bacteria
128	Med-Io7-77mDCM-C1130	18086	36.45	Bacteria	Cyanobacteria
128	Med-OCT2015-75m-C2023	11797	37.92	Bacteria
129	MedWinter-DEC2013-20m-C1875	18008	34.25	Bacteria	Cyanobacteria
129	MedWinter-JAN2015-CoastalC769	10718	35.92	Bacteria
130	Med-SEP2014-30m-C1647	11535	39.23	Bacteria	Cyanobacteria
130	MedDCM-SEP2014-C832	16632	39.87	Bacteria	Cyanobacteria
131	MedDCM-SEP2015_HS-C1661	17567	35.83	Bacteria
131	Med-OCT2015-75m-C1955	12029	35.83	Bacteria
132	Med-Io7-77mDCM-C662	19830	35.69	Bacteria
132	MedDCM-SEP2015_HS-C1058	22691	36.08	Bacteria
133	MedDCM-OCT2015-60m-C1423	12920	31.83	Bacteria
133	MedDCM-SEP2015_HS-C4437	10117	32.61	Bacteria
134	Med-SEP2014-15m-C2737	10614	34.14	Bacteria
134	Med-OCT2015-15m-C3592	11677	34.3	Bacteria
135	MedWinter-DEC2013-20m-C4261	10306	32.53	Bacteria	Alphaproteobacteria
135	MedDCM-SEP2013-LF-C8	14422	32.17	Bacteria
136	Med-OCT2015-15m-C2186	15758	32.05	Bacteria
136	Med-OCT2015-30m-C559	19436	32.21	Bacteria
137	MedDCM-SEP2015_HS-C2376	14308	33.86	Bacteria
137	MedDCM-OCT2015-60m-C1132	14501	34.25	Bacteria
138	MedDCM-SEP2015_HS-C3287	11990	32.56	Bacteria
138	MedDCM-OCT2015-60m-C1184	14211	32.59	Bacteria
139	MedWinter-DEC2013-20m-C607	36133	40.46	Bacteria	Cyanobacteria
139	Med-SEP2014-15m-C420	31378	40.62	Bacteria	Cyanobacteria
140	Med-OCT2015-15m-C458	37185	37.17	Bacteria
140	Med-OCT2015-30m-C141	37185	37.17	Bacteria
141	Med-OCT2015-90m-C14	80879	30.17	Eukaryota	Pelagomonadales
141	Med-OCT2015-75m-C206	38282	30.43	Eukaryota	Pelagomonadales
142	Med-SEP2014-30m-C1689	11366	42.72	Bacteria
142	MedWinter-JAN2015-CoastalC743	10951	42.77	Bacteria
143	Med-OCT2015-75m-C109	50891	31.76	Eukaryota	Pelagomonadales
143	MedDCM-SEP2015_HS-C219	50829	31.77	Eukaryota	Pelagomonadales
144	MedWinter-DEC2013-20m-C1440	21416	35.15	Bacteria	Cyanobacteria
144	MedDCM-SEP2014-C543	20338	34.96	Bacteria
145	MedDCM-SEP2014-C1677	10904	36.53	Bacteria
145	MedDCM-SEP2015_HS-C149	61296	37.49	Bacteria
146	MedDCM-SEP2015_HS-C610	30044	34.24	Bacteria
146	Med-OCT2015-75m-C308	32134	35.24	Bacteria
147	Med-Io7-77mDCM-C1972	10214	35.23	Bacteria
147	MedDCM-SEP2014-C701	17955	36.05	Bacteria
148	Med-SEP2014-30m-C1120	14603	39.65	Bacteria
148	MedDCM-SEP2014-C1035	14591	39.67	Bacteria
149	MedWinter-DEC2013-20m-C4119	10591	36.54	Bacteria	Cyanobacteria
149	Med-SEP2014-15m-C2446	11354	36.69	Bacteria
150	Med-OCT2015-30m-C1734	11339	30.52	Bacteria
150	Med-OCT2015-15m-C927	26099	30.84	Bacteria
151	Med-OCT2015-15m-C242	48142	36.7	Bacteria	Cyanobacteria
151	Med-SEP2014-30m-C199	37947	36.72	Bacteria	Cyanobacteria
152	Med-OCT2015-15m-C3257	12415	32.09	Bacteria
152	Med-SEP2014-15m-C908	20105	32.91	Bacteria
153	Med-Io17-3500mDeep-C421	42312	32.55	Bacteria	SAR11
153	Med-Ae2-600mDeep-C93	43016	32.77	Bacteria	SAR11
154	Med-OCT2015-30m-C1542	12025	31.51	Bacteria
154	Med-OCT2015-15m-C3378	12174	31.65	Bacteria
155	Med-Ae1-75mDCM-C190	15321	37.74	Bacteria	Cyanobacteria
155	MedDCM-SEP2015_HS-C2416	14155	39.48	Bacteria	Cyanobacteria
156	Med-Ae1-75mDCM-C237	13504	35.79	Bacteria
156	Med-Io7-77mDCM-C1879	11728	37.41	Bacteria
157	Med-OCT2015-75m-C1263	14958	34.73	Bacteria
157	MedDCM-SEP2015_HS-C4163	10483	35.33	Bacteria
158	Med-Io7-77mDCM-C60	76983	36.68	Bacteria	Cyanobacteria
158	Med-Io16-70mDCM-C105	16874	36.35	Bacteria	Cyanobacteria
159	MedWinter-JAN2015-20m-LF-C41	33843	43.96	Eukaryota	Mamiellales
159	MedWinter-JAN2015-80m-C55	45359	44.33	Eukaryota	Mamiellales
160	MedDCM-OCT2015-60m-C820	17216	30.29	Bacteria
160	MedDCM-SEP2015_HS-C1485	18679	30.39	Bacteria
161	MedDCM-SEP2015_HS-C3185	12181	34.29	Bacteria	Cyanobacteria
161	Med-OCT2015-75m-C1685	12974	34.41	Bacteria
162	MedDCM-SEP2015_HS-C710	27842	36.28	Bacteria	Cyanobacteria
162	Med-OCT2015-75m-C131	46174	36.55	Bacteria
163	Med-OCT2015-75m-C1491	13742	30.92	Bacteria
163	Med-OCT2015-90m-C561	22051	31.55	Bacteria
164	MedWinter-DEC2013-20m-C659	34374	39.42	Bacteria
164	Med-SEP2014-15m-C2056	12642	39.65	Bacteria
165	MedWinter-DEC2013-20m-C3759	11289	35.43	Bacteria	Cyanobacteria
165	MedDCM-SEP2014-C1160	13601	34.26	Bacteria
166	Med-Ae1-75mDCM-C332	10597	36.68	Bacteria	Cyanobacteria
166	Med-Io16-70mDCM-C259	10679	36.84	Bacteria	Cyanobacteria
167	MedDCM-SEP2014-C417	23969	35.74	Bacteria	SAR11
167	Med-SEP2014-30m-C500	23128	35.83	Bacteria	SAR11
168	MedDCM-SEP2013-C317	15790	40.85	Bacteria	Cyanobacteria
168	MedDCM-SEP2014-C235	31353	39.09	Bacteria
169	MedWinter-JAN2015-20m-LF-C107	22383	36.53	Bacteria	SAR116
169	MedWinter-JAN2015-80m-C631	12302	36.86	Bacteria	SAR116
170	Med-OCT2015-75m-C1142	15610	37.1	Bacteria
170	Med-OCT2015-90m-C1564	12938	37.86	Bacteria
171	Med-SEP2014-30m-C47	79799	37.65	Bacteria
171	Med-SEP2014-15m-C2001	12816	39.17	Bacteria
172	MedWinter-JAN2015-20m-LF-C273	13010	35.56	Bacteria
172	MedDCM-SEP2014-C1002	14970	35.77	Bacteria
173	Med-OCT2015-75m-C2137	11493	33.69	Bacteria
173	MedDCM-SEP2015_HS-C2654	13385	33.82	Bacteria
174	Med-OCT2015-30m-C67	50242	35.67	Bacteria
174	Med-OCT2015-15m-C955	25504	36.59	Bacteria
175	Med-SEP2014-30m-C1672	11421	36.25	Bacteria	Cyanobacteria
175	MedDCM-SEP2014-C1126	13823	37.18	Bacteria	Cyanobacteria
176	Med-SEP2014-30m-C174	41493	37.58	Bacteria	Cyanobacteria
176	Med-OCT2015-15m-C453	37311	37.78	Bacteria	Cyanobacteria
177	Med-SEP2014-15m-C1691	14128	40.28	Bacteria	Cyanobacteria
177	MedWinter-DEC2013-20m-C2728	13973	40.55	Bacteria	Cyanobacteria
Singleton	MedDCM-SEP2014-C130	40506	34.56	Bacteria	Actinomarina
Singleton	Med-Io17-3500mDeep-C537	35372	32.12	Bacteria	Alphaproteobacteria
Singleton	Med-SEP2014-30m-C1513	12113	32.89	Bacteria	Alphaproteobacteria
Singleton	Med-Io7-77mDCM-C239	35845	33.45	Bacteria	Alphaproteobacteria
Singleton	MedWinter-DEC2013-20m-C945	27581	35.15	Bacteria	Alphaproteobacteria
Singleton	Med-Io16-70mDCM-C63	20968	37.85	Bacteria	Alphaproteobacteria
Singleton	Med-OCT2015-15m-C16	142663	38.21	Bacteria	Alphaproteobacteria
Singleton	Med-OCT2015-15m-C18	138459	39.37	Bacteria	Alphaproteobacteria
Singleton	Med-SEP2014-15m-C363	33348	44.63	Bacteria	Alphaproteobacteria
Singleton	Med-SEP2014-15m-C307	36519	32.38	Bacteria	Alphaproteobacteria
Singleton	Med-OCT2015-30m-C455	21589	31.67	Bacteria	Bacteroidetes
Singleton	Med-Io16-70mDCM-C202	12431	32.35	Bacteria	Cyanobacteria
Singleton	Med-Io16-70mDCM-C15	61472	32.41	Bacteria	Cyanobacteria
Singleton	Med-Ae1-75mDCM-C240	13364	32.94	Bacteria	Cyanobacteria
Singleton	Med-Io16-70mDCM-C8	50525	32.94	Bacteria	Cyanobacteria
Singleton	Med-Io16-70mDCM-C54	21910	33.14	Bacteria	Cyanobacteria
Singleton	MedDCM-SEP2015_HS-C3635	11351	33.27	Bacteria	Cyanobacteria
Singleton	Med-Io16-70mDCM-C35	28056	33.49	Bacteria	Cyanobacteria
Singleton	Med-Io16-70mDCM-C49	42095	33.69	Bacteria	Cyanobacteria
Singleton	Med-Ae1-75mDCM-C248	13133	33.82	Bacteria	Cyanobacteria
Singleton	Med-Io7-77mDCM-C1384	12839	33.87	Bacteria	Cyanobacteria
Singleton	Med-Io16-70mDCM-C24	31805	34.03	Bacteria	Cyanobacteria
Singleton	MedDCM-JUL2012-C1266	13955	34.05	Bacteria	Cyanobacteria
Singleton	MedDCM-SEP2015_HS-C2666	13353	34.2	Bacteria	Cyanobacteria
Singleton	Med-Io16-70mDCM-C263	10604	34.28	Bacteria	Cyanobacteria
Singleton	MedDCM-SEP2014-C882	16129	34.47	Bacteria	Cyanobacteria
Singleton	Med-Io7-77mDCM-C88	60699	34.57	Bacteria	Cyanobacteria
Singleton	Med-Ae1-75mDCM-C186	15654	34.63	Bacteria	Cyanobacteria
Singleton	Med-Io16-70mDCM-C58	21314	34.89	Bacteria	Cyanobacteria
Singleton	Med-Ae1-75mDCM-C85	26673	35.14	Bacteria	Cyanobacteria
Singleton	Med-SEP2014-30m-C1832	10860	35.29	Bacteria	Cyanobacteria
Singleton	Med-Io16-70mDCM-C98	17447	35.31	Bacteria	Cyanobacteria
Singleton	MedWinter-DEC2013-20m-C127	80042	35.54	Bacteria	Cyanobacteria
Singleton	Med-Io16-70mDCM-C69	20256	35.57	Bacteria	Cyanobacteria
Singleton	Med-Ae1-75mDCM-C132	19709	35.64	Bacteria	Cyanobacteria
Singleton	MedDCM-SEP2015_HS-C3178	12189	35.84	Bacteria	Cyanobacteria
Singleton	MedWinter-DEC2013-20m-C3341	12342	35.97	Bacteria	Cyanobacteria
Singleton	Med-Io16-70mDCM-C36	27298	36.06	Bacteria	Cyanobacteria
Singleton	MedDCM-OCT2015-60m-C774	17755	36.11	Bacteria	Cyanobacteria
Singleton	Med-Ae1-75mDCM-C221	14259	36.15	Bacteria	Cyanobacteria
Singleton	MedDCM-SEP2015_HS-C3704	11201	36.23	Bacteria	Cyanobacteria
Singleton	MedDCM-SEP2015_HS-C2368	14330	36.25	Bacteria	Cyanobacteria
Singleton	Med-Ae1-75mDCM-C112	22492	36.35	Bacteria	Cyanobacteria
Singleton	Med-Ae1-75mDCM-C239	13394	36.49	Bacteria	Cyanobacteria
Singleton	MedDCM-SEP2015_HS-C3106	12350	36.49	Bacteria	Cyanobacteria
Singleton	Med-OCT2015-15m-C1609	18943	36.51	Bacteria	Cyanobacteria
Singleton	Med-Io16-70mDCM-C87	18466	36.56	Bacteria	Cyanobacteria
Singleton	Med-OCT2015-15m-C1122	23330	36.68	Bacteria	Cyanobacteria
Singleton	MedDCM-SEP2015_HS-C3032	12495	36.7	Bacteria	Cyanobacteria
Singleton	MedWinter-DEC2013-20m-C138	77936	36.75	Bacteria	Cyanobacteria
Singleton	Med-OCT2015-15m-C176	55585	36.76	Bacteria	Cyanobacteria
Singleton	MedDCM-SEP2015_HS-C2093	15317	37.18	Bacteria	Cyanobacteria
Singleton	MedWinter-JAN2015-20m-LF-C411	10262	37.28	Bacteria	Cyanobacteria
Singleton	Med-Io7-77mDCM-C127	104365	37.29	Bacteria	Cyanobacteria
Singleton	Med-Io16-70mDCM-C26	30920	37.57	Bacteria	Cyanobacteria
Singleton	Med-Ae1-75mDCM-C296	11472	37.6	Bacteria	Cyanobacteria
Singleton	Med-SEP2014-15m-C174	48322	37.76	Bacteria	Cyanobacteria
Singleton	Med-Io7-77mDCM-C29	145822	37.81	Bacteria	Cyanobacteria
Singleton	Med-Io7-77mDCM-C526	42897	38.02	Bacteria	Cyanobacteria
Singleton	MedDCM-SEP2015_HS-C3566	11462	38.09	Bacteria	Cyanobacteria
Singleton	Med-OCT2015-15m-C936	26012	38.1	Bacteria	Cyanobacteria
Singleton	Med-Io7-77mDCM-C1203	14174	38.22	Bacteria	Cyanobacteria
Singleton	Med-Io7-77mDCM-C460	24022	38.23	Bacteria	Cyanobacteria
Singleton	Med-Io7-77mDCM-C1436	12873	38.28	Bacteria	Cyanobacteria
Singleton	MedDCM-SEP2013-C282	16712	38.31	Bacteria	Cyanobacteria
Singleton	Med-OCT2015-30m-C54	53935	38.49	Bacteria	Cyanobacteria
Singleton	Med-Io7-77mDCM-C281	57051	38.63	Bacteria	Cyanobacteria
Singleton	Med-Io16-70mDCM-C84	18719	38.71	Bacteria	Cyanobacteria
Singleton	Med-Io7-77mDCM-C388	26837	38.85	Bacteria	Cyanobacteria
Singleton	Med-OCT2015-30m-C98	42233	38.93	Bacteria	Cyanobacteria
Singleton	Med-OCT2015-30m-C1634	11699	38.99	Bacteria	Cyanobacteria
Singleton	Med-OCT2015-30m-C354	23927	39.06	Bacteria	Cyanobacteria
Singleton	Med-Io7-77mDCM-C45	119966	39.22	Bacteria	Cyanobacteria
Singleton	Med-OCT2015-30m-C82	46823	39.22	Bacteria	Cyanobacteria
Singleton	Med-Io7-77mDCM-C264	33417	39.25	Bacteria	Cyanobacteria
Singleton	MedDCM-JUL2012-C1625	11748	39.27	Bacteria	Cyanobacteria
Singleton	Med-Io7-77mDCM-C23	143563	39.27	Bacteria	Cyanobacteria
Singleton	MedDCM-SEP2014-C1868	10217	39.38	Bacteria	Cyanobacteria
Singleton	MedDCM-SEP2015_HS-C3266	12023	39.49	Bacteria	Cyanobacteria
Singleton	Med-OCT2015-15m-C23	115765	39.54	Bacteria	Cyanobacteria
Singleton	Med-Io7-77mDCM-C226	37429	39.57	Bacteria	Cyanobacteria
Singleton	Med-Io7-77mDCM-C26	133407	39.6	Bacteria	Cyanobacteria
Singleton	MedDCM-SEP2013-C109	29175	39.69	Bacteria	Cyanobacteria
Singleton	MedDCM-SEP2014-C341	26367	40.13	Bacteria	Cyanobacteria
Singleton	Med-SEP2014-15m-C1667	14244	40.89	Bacteria	Cyanobacteria
Singleton	Med-SEP2014-15m-C1723	13994	40.92	Bacteria	Cyanobacteria
Singleton	Med-OCT2015-15m-C9	175282	41.04	Bacteria	Cyanobacteria
Singleton	Med-Io7-77mDCM-C86	61786	41.21	Bacteria	Cyanobacteria
Singleton	Med-SEP2014-15m-C134	56261	41.39	Bacteria	Cyanobacteria
Singleton	Med-SEP2014-15m-C2668	10762	41.45	Bacteria	Cyanobacteria
Singleton	Med-Io16-70mDCM-C88	18432	41.88	Bacteria	Cyanobacteria
Singleton	Med-SEP2014-15m-C1825	13513	41.98	Bacteria	Cyanobacteria
Singleton	MedWinter-JAN2015-20m-LF-C242	13977	41.98	Bacteria	Cyanobacteria
Singleton	Med-SEP2014-15m-C1518	15122	42.04	Bacteria	Cyanobacteria
Singleton	MedDCM-SEP2014-C1806	10413	42.15	Bacteria	Cyanobacteria
Singleton	Med-SEP2014-15m-C2482	11275	42.42	Bacteria	Cyanobacteria
Singleton	MedDCM-SEP2014-C380	24991	42.53	Bacteria	Cyanobacteria
Singleton	MedDCM-SEP2014-C945	15513	43.66	Bacteria	Cyanobacteria
Singleton	Med-SEP2014-30m-C454	24797	39.39	Bacteria	Cyanobacteria
Singleton	Med-SEP2014-30m-C31	90389	34.76	Bacteria	Cyanobacteria
Singleton	Med-Io7-77mDCM-C311	69099	34.78	Bacteria	Cyanobacteria
Singleton	MedDCM-SEP2015_HS-C2126	15213	34.34	Eukaryota	Mamiellales
Singleton	MedDCM-JUL2012-C506	19864	38.98	Eukaryota	Mamiellales
Singleton	MedDCM-JUL2012-C1092	13077	39.82	Eukaryota	Mamiellales
Singleton	MedDCM-JUL2012-C420	50535	41.36	Eukaryota	Mamiellales
Singleton	MedWinter-JAN2015-80m-C287	19710	41.61	Eukaryota	Mamiellales
Singleton	Med-OCT2015-2000m-C844	30778	39.81	Bacteria	Oscillatoriales
Singleton	Med-OCT2015-2000m-C2607	14634	39.89	Bacteria	Oscillatoriales
Singleton	MedDCM-SEP2015_HS-C2289	14627	29.98	Eukaryota	Pelagomonadales
Singleton	MedDCM-SEP2015_HS-C1089	22283	30.44	Eukaryota	Pelagomonadales
Singleton	MedDCM-SEP2015_HS-C3434	11705	30.71	Eukaryota	Pelagomonadales
Singleton	MedDCM-SEP2015_HS-C2861	12935	31.15	Eukaryota	Pelagomonadales
Singleton	MedDCM-SEP2015_HS-C666	28780	31.82	Eukaryota	Pelagomonadales
Singleton	MedDCM-SEP2015_HS-C74	80540	31.98	Eukaryota	Pelagomonadales
Singleton	MedDCM-SEP2015_HS-C230	49521	33.09	Eukaryota	Pelagomonadales
Singleton	MedDCM-SEP2015_HS-C72	81211	33.54	Eukaryota	Pelagomonadales
Singleton	Med-OCT2015-15m-C640	31071	18.8	Eukaryota	Phaeocystales
Singleton	Med-OCT2015-15m-C1277	21762	18.84	Eukaryota	Phaeocystales
Singleton	Med-OCT2015-15m-C909	26474	18.89	Eukaryota	Phaeocystales
Singleton	Med-OCT2015-15m-C4158	10665	19.24	Eukaryota	Phaeocystales
Singleton	Med-OCT2015-15m-C1711	18232	19.27	Eukaryota	Phaeocystales
Singleton	Med-OCT2015-15m-C2740	13754	19.79	Eukaryota	Phaeocystales
Singleton	Med-OCT2015-15m-C368	41427	19.79	Eukaryota	Phaeocystales
Singleton	Med-OCT2015-15m-C2054	16413	19.83	Eukaryota	Phaeocystales
Singleton	Med-OCT2015-15m-C3920	11053	20.26	Eukaryota	Phaeocystales
Singleton	Med-OCT2015-15m-C626	31487	20.64	Eukaryota	Phaeocystales
Singleton	Med-OCT2015-15m-C3177	12617	21.4	Eukaryota	Phaeocystales
Singleton	Med-OCT2015-15m-C380	40744	21.42	Eukaryota	Phaeocystales
Singleton	Med-OCT2015-15m-C995	24878	21.83	Eukaryota	Phaeocystales
Singleton	Med-OCT2015-15m-C374	41099	22.16	Eukaryota	Phaeocystales
Singleton	Med-OCT2015-15m-C4536	10146	32.04	Eukaryota	Phaeocystales
Singleton	Med-OCT2015-15m-C2936	13249	30.68	Bacteria	Proteobacteria
Singleton	Med-SEP2014-15m-C2837	10363	32.26	Bacteria	SAR11
Singleton	MedDCM-SEP2014-C140	39830	33.14	Bacteria	SAR11
Singleton	Med-SEP2014-30m-C513	22751	33.65	Bacteria	SAR11
Singleton	Med-Ae2-600mDeep-C879	11786	33.91	Bacteria	SAR11
Singleton	Med-Ae2-600mDeep-C89	43595	35.94	Bacteria	SAR11
Singleton	Med-OCT2015-15m-C662	30619	36.15	Bacteria	SAR11
Singleton	Med-Io7-77mDCM-C14	159013	39.01	Bacteria	SAR11
Singleton	Med-Io7-77mDCM-C401	26103	32.11	Bacteria	SAR11
Singleton	Med-OCT2015-15m-C4631	10018	35.12	Bacteria	SAR116
Singleton	MedWinter-JAN2015-80m-C192	24408	36.32	Bacteria	SAR116
Singleton	Med-SEP2014-15m-C941	19833	37.19	Bacteria	SAR116
Singleton	Med-SEP2014-15m-C146	53516	37.6	Bacteria	SAR116
Singleton	Med-OCT2015-15m-C3915	11063	39.35	Bacteria	SAR116
Singleton	Med-SEP2014-30m-C1648	11523	42.64	Bacteria	SAR116
Singleton	Med-SEP2014-15m-C135	56252	47.51	Bacteria	SAR116
Singleton	Med-OCT2015-15m-C165	56255	47.73	Bacteria	SAR116
Singleton	Med-OCT2015-2000m-C859	30521	27.68	Bacteria	Viriophage
Singleton	Med-OCT2015-30m-C2194	10023	25.06	Bacteria
Singleton	Med-SEP2014-15m-C245	40851	25.65	Bacteria
Singleton	Med-OCT2015-75m-C1351	14499	25.77	Bacteria
Singleton	MedDCM-SEP2015_HS-C932	24046	29.01	Bacteria
Singleton	Med-Io17-3500mDeep-C1703	15090	29.38	Bacteria
Singleton	Med-SEP2014-30m-C2032	10175	29.54	Bacteria
Singleton	MedDCM-SEP2015_HS-C997	23349	29.57	Bacteria
Singleton	Med-OCT2015-15m-C35	103346	29.65	Bacteria
Singleton	MedDCM-OCT2015-60m-C96	50157	30.19	Bacteria
Singleton	Med-OCT2015-30m-C1511	12164	30.36	Bacteria
Singleton	MedDCM-SEP2014-C607	19236	30.37	Bacteria
Singleton	Med-OCT2015-75m-C304	32170	30.42	Bacteria
Singleton	Med-OCT2015-30m-C330	24662	30.5	Bacteria
Singleton	MedWinter-DEC2013-20m-C1370	22073	30.54	Bacteria
Singleton	MedWinter-DEC2013-20m-C1527	20653	30.54	Bacteria
Singleton	MedDCM-SEP2014-C1311	12627	30.55	Bacteria
Singleton	Med-OCT2015-75m-C1592	13349	30.61	Bacteria
Singleton	Med-Io17-3500mDeep-C2877	10355	30.65	Bacteria
Singleton	MedDCM-SEP2015_HS-C670	28668	30.65	Bacteria
Singleton	MedDCM-SEP2015_HS-C2807	13058	30.76	Bacteria
Singleton	MedDCM-SEP2014-C812	16841	30.84	Bacteria
Singleton	MedDCM-SEP2014-C723	17736	30.86	Bacteria
Singleton	Med-Io17-3500mDeep-C518	36171	30.92	Bacteria
Singleton	Med-OCT2015-15m-C3069	12920	31	Bacteria
Singleton	Med-SEP2014-30m-C355	28739	31.03	Bacteria
Singleton	MedDCM-SEP2015_HS-C1698	17351	31.05	Bacteria
Singleton	MedDCM-SEP2015_HS-C3557	11475	31.08	Bacteria
Singleton	MedDCM-SEP2014-C1184	13441	31.11	Bacteria
Singleton	Med-SEP2014-15m-C115	60234	31.16	Bacteria
Singleton	Med-OCT2015-30m-C1755	11259	31.17	Bacteria
Singleton	Med-OCT2015-30m-C451	21629	31.17	Bacteria
Singleton	MedDCM-SEP2014-C395	24601	31.27	Bacteria
Singleton	MedDCM-SEP2014-C1024	14661	31.29	Bacteria
Singleton	MedDCM-SEP2014-C1460	11838	31.29	Bacteria
Singleton	Med-Ae2-600mDeep-C46	64894	31.3	Bacteria
Singleton	Med-Io17-3500mDeep-C2589	11114	31.3	Bacteria
Singleton	MedDCM-SEP2015_HS-C1733	17126	31.31	Bacteria
Singleton	Med-OCT2015-15m-C130	61881	31.34	Bacteria
Singleton	Med-SEP2014-15m-C1512	15171	31.4	Bacteria
Singleton	Med-OCT2015-30m-C794	16760	31.48	Bacteria
Singleton	MedDCM-SEP2014-C688	18144	31.58	Bacteria
Singleton	Med-OCT2015-30m-C1205	13543	31.59	Bacteria
Singleton	Med-OCT2015-15m-C2886	13376	31.62	Bacteria
Singleton	Med-OCT2015-75m-C360	29026	31.62	Bacteria
Singleton	Med-Ae1-75mDCM-C308	11122	31.63	Bacteria
Singleton	Med-OCT2015-30m-C1368	12739	31.64	Bacteria
Singleton	Med-OCT2015-15m-C3985	10915	31.71	Bacteria
Singleton	MedDCM-SEP2013-C477	12732	31.72	Bacteria
Singleton	MedWinter-DEC2013-20m-C1746	18775	31.73	Bacteria
Singleton	Med-OCT2015-15m-C3735	11403	31.75	Bacteria
Singleton	Med-OCT2015-30m-C267	26877	31.78	Bacteria
Singleton	Med-SEP2014-30m-C990	15685	31.78	Bacteria
Singleton	Med-OCT2015-15m-C3693	11480	31.81	Bacteria
Singleton	MedDCM-SEP2015_HS-C2407	14192	31.83	Bacteria
Singleton	Med-Io16-70mDCM-C200	12223	31.85	Bacteria
Singleton	MedWinter-DEC2013-20m-C948	27507	31.86	Bacteria
Singleton	Med-OCT2015-30m-C2021	10473	31.9	Bacteria
Singleton	Med-Io7-77mDCM-C116	70387	32.05	Bacteria
Singleton	Med-SEP2014-15m-C2890	10254	32.07	Bacteria
Singleton	MedDCM-OCT2015-60m-C2185	10411	32.1	Bacteria
Singleton	Med-SEP2014-30m-C1734	11179	32.1	Bacteria
Singleton	Med-OCT2015-30m-C1672	11559	32.14	Bacteria
Singleton	Med-OCT2015-30m-C583	19075	32.14	Bacteria
Singleton	Med-Ae1-75mDCM-C74	29448	32.17	Bacteria
Singleton	Med-Ae1-75mDCM-C53	37889	32.19	Bacteria
Singleton	Med-Io16-70mDCM-C173	13359	32.21	Bacteria
Singleton	MedDCM-SEP2015_HS-C2777	13109	32.21	Bacteria
Singleton	Med-OCT2015-15m-C3680	11512	32.24	Bacteria
Singleton	Med-OCT2015-30m-C1352	12824	32.24	Bacteria
Singleton	MedDCM-JUL2012-C1060	13966	32.26	Bacteria
Singleton	Med-Io7-77mDCM-C302	30964	32.27	Bacteria
Singleton	MedDCM-SEP2014-C1878	10203	32.27	Bacteria
Singleton	Med-Io7-77mDCM-C2278	11010	32.3	Bacteria
Singleton	MedWinter-JAN2015-80m-C112	33144	32.32	Bacteria
Singleton	Med-OCT2015-30m-C599	18943	32.34	Bacteria
Singleton	Med-OCT2015-90m-C291	29595	32.38	Bacteria
Singleton	MedDCM-SEP2015_HS-C326	41493	32.42	Bacteria
Singleton	Med-OCT2015-75m-C1740	12781	32.42	Bacteria
Singleton	Med-OCT2015-30m-C431	21956	32.48	Bacteria
Singleton	MedDCM-SEP2014-C1262	12874	32.48	Bacteria
Singleton	Med-Io16-70mDCM-C239	11156	32.52	Bacteria
Singleton	Med-Io16-70mDCM-C321	11485	32.55	Bacteria
Singleton	Med-Io16-70mDCM-C279	10335	32.6	Bacteria
Singleton	MedDCM-SEP2015_HS-C907	24412	32.61	Bacteria
Singleton	Med-OCT2015-75m-C1971	11970	32.66	Bacteria
Singleton	Med-SEP2014-15m-C1569	14829	32.68	Bacteria
Singleton	Med-OCT2015-15m-C3035	13021	32.75	Bacteria
Singleton	Med-OCT2015-30m-C646	18422	32.75	Bacteria
Singleton	Med-OCT2015-90m-C2064	11190	32.78	Bacteria
Singleton	Med-SEP2014-30m-C1294	13281	32.79	Bacteria
Singleton	MedDCM-SEP2014-C1352	12425	32.8	Bacteria
Singleton	MedDCM-SEP2014-C792	17081	32.8	Bacteria
Singleton	Med-SEP2014-15m-C1246	17185	32.81	Bacteria
Singleton	MedDCM-SEP2014-C439	23360	32.82	Bacteria
Singleton	MedWinter-DEC2013-20m-C3694	11430	32.83	Bacteria
Singleton	Med-Io7-77mDCM-C228	37183	32.83	Bacteria
Singleton	MedDCM-SEP2015_HS-C3590	11420	32.84	Bacteria
Singleton	Med-SEP2014-30m-C702	19189	32.86	Bacteria
Singleton	MedDCM-SEP2015_HS-C1252	20564	32.88	Bacteria
Singleton	Med-SEP2014-15m-C1086	18440	32.88	Bacteria
Singleton	Med-OCT2015-15m-C3733	11405	32.89	Bacteria
Singleton	Med-SEP2014-15m-C2495	11241	32.94	Bacteria
Singleton	MedDCM-SEP2014-C1248	12966	32.94	Bacteria
Singleton	Med-Ae1-75mDCM-C142	18740	33.04	Bacteria
Singleton	Med-OCT2015-15m-C3638	11596	33.05	Bacteria
Singleton	Med-Io16-70mDCM-C46	23946	33.07	Bacteria
Singleton	Med-OCT2015-30m-C2176	10056	33.09	Bacteria
Singleton	MedDCM-SEP2013-LF-C1	19720	33.13	Bacteria
Singleton	Med-Io7-77mDCM-C1890	10683	33.16	Bacteria
Singleton	Med-SEP2014-15m-C1715	14026	33.17	Bacteria
Singleton	Med-OCT2015-30m-C2181	10047	33.18	Bacteria
Singleton	MedDCM-SEP2015_HS-C1917	16121	33.2	Bacteria
Singleton	Med-OCT2015-30m-C1898	10799	33.21	Bacteria
Singleton	MedDCM-SEP2015_HS-C369	39098	33.27	Bacteria
Singleton	Med-OCT2015-30m-C386	22950	33.32	Bacteria
Singleton	Med-Io7-77mDCM-C1808	10835	33.35	Bacteria
Singleton	MedDCM-SEP2015_HS-C896	24636	33.35	Bacteria
Singleton	MedDCM-SEP2015_HS-C4154	10493	33.36	Bacteria
Singleton	MedDCM-SEP2015_HS-C2736	13180	33.38	Bacteria
Singleton	Med-Io7-77mDCM-C1934	10373	33.4	Bacteria
Singleton	Med-OCT2015-15m-C3132	12729	33.4	Bacteria
Singleton	Med-OCT2015-30m-C1387	12646	33.4	Bacteria
Singleton	Med-SEP2014-15m-C1827	13496	33.46	Bacteria
Singleton	Med-OCT2015-75m-C1033	16357	33.47	Bacteria
Singleton	Med-OCT2015-90m-C911	17250	33.48	Bacteria
Singleton	Med-OCT2015-15m-C3808	11285	33.49	Bacteria
Singleton	Med-OCT2015-15m-C4518	10166	33.49	Bacteria
Singleton	Med-OCT2015-30m-C930	15359	33.5	Bacteria
Singleton	Med-Io7-77mDCM-C2169	10599	33.51	Bacteria
Singleton	Med-Io7-77mDCM-C2279	11928	33.51	Bacteria
Singleton	Med-Io7-77mDCM-C1582	12749	33.52	Bacteria
Singleton	MedDCM-SEP2014-C973	15287	33.54	Bacteria
Singleton	Med-OCT2015-30m-C180	32841	33.55	Bacteria
Singleton	Med-SEP2014-15m-C2006	12805	33.57	Bacteria
Singleton	Med-SEP2014-15m-C86	68914	33.57	Bacteria
Singleton	Med-Io17-3500mDeep-C1261	18526	33.59	Bacteria
Singleton	Med-SEP2014-30m-C1358	12839	33.6	Bacteria
Singleton	Med-OCT2015-75m-C1623	13236	33.62	Bacteria
Singleton	Med-OCT2015-30m-C675	17998	33.63	Bacteria
Singleton	MedDCM-SEP2014-C407	24202	33.63	Bacteria
Singleton	Med-OCT2015-1000m-C1699	10339	33.64	Bacteria
Singleton	Med-SEP2014-15m-C508	27407	33.64	Bacteria
Singleton	Med-OCT2015-90m-C646	20475	33.7	Bacteria
Singleton	MedDCM-SEP2015_HS-C2274	14684	33.72	Bacteria
Singleton	Med-OCT2015-90m-C682	19692	33.72	Bacteria
Singleton	MedDCM-OCT2015-60m-C1819	11401	33.74	Bacteria
Singleton	Med-Io7-77mDCM-C1612	25861	33.75	Bacteria
Singleton	MedDCM-SEP2013-C251	17829	33.76	Bacteria
Singleton	Med-OCT2015-30m-C320	24971	33.77	Bacteria
Singleton	MedDCM-SEP2015_HS-C1359	19617	33.8	Bacteria
Singleton	Med-OCT2015-75m-C1497	13722	33.81	Bacteria
Singleton	Med-Io7-77mDCM-C1663	12993	33.83	Bacteria
Singleton	MedDCM-SEP2015_HS-C2743	13169	33.86	Bacteria
Singleton	Med-OCT2015-30m-C322	24819	33.89	Bacteria
Singleton	MedWinter-DEC2013-20m-C690	33524	33.91	Bacteria
Singleton	Med-OCT2015-30m-C265	26969	33.92	Bacteria
Singleton	Med-OCT2015-75m-C1270	14937	33.92	Bacteria
Singleton	Med-OCT2015-30m-C1513	12141	33.95	Bacteria
Singleton	Med-OCT2015-30m-C670	18050	33.95	Bacteria
Singleton	Med-SEP2014-30m-C1462	12406	33.95	Bacteria
Singleton	Med-OCT2015-30m-C1444	12423	33.98	Bacteria
Singleton	Med-OCT2015-30m-C1391	12623	34	Bacteria
Singleton	Med-OCT2015-30m-C189	32421	34.01	Bacteria
Singleton	Med-Io16-70mDCM-C144	14157	34.02	Bacteria
Singleton	Med-Io7-77mDCM-C1373	12877	34.03	Bacteria
Singleton	MedDCM-OCT2015-60m-C1118	14562	34.03	Bacteria
Singleton	MedDCM-SEP2015_HS-C390	38280	34.04	Bacteria
Singleton	Med-OCT2015-30m-C888	15850	34.04	Bacteria
Singleton	MedWinter-DEC2013-20m-C1744	18799	34.12	Bacteria
Singleton	Med-Io17-3500mDeep-C1920	13855	34.12	Bacteria
Singleton	Med-OCT2015-90m-C2409	10292	34.12	Bacteria
Singleton	Med-OCT2015-15m-C476	36547	34.15	Bacteria
Singleton	Med-OCT2015-30m-C241	28372	34.16	Bacteria
Singleton	Med-OCT2015-30m-C672	18028	34.16	Bacteria
Singleton	MedWinter-DEC2013-20m-C3306	12430	34.19	Bacteria
Singleton	Med-Io7-77mDCM-C822	27184	34.2	Bacteria
Singleton	Med-OCT2015-1000m-C706	16742	34.2	Bacteria
Singleton	MedWinter-JAN2015-CoastalC785	10602	34.2	Bacteria
Singleton	Med-OCT2015-30m-C33	64170	34.23	Bacteria
Singleton	Med-SEP2014-15m-C989	19360	34.23	Bacteria
Singleton	Med-OCT2015-30m-C172	33322	34.25	Bacteria
Singleton	Med-SEP2014-15m-C1558	14908	34.27	Bacteria
Singleton	Med-SEP2014-15m-C1091	18412	34.28	Bacteria
Singleton	Med-SEP2014-30m-C736	18721	34.28	Bacteria
Singleton	Med-OCT2015-30m-C1186	13629	34.29	Bacteria
Singleton	Med-Ae2-600mDeep-C519	16573	34.3	Bacteria
Singleton	Med-Io16-70mDCM-C10	44346	34.3	Bacteria
Singleton	Med-Ae2-600mDeep-C327	21183	34.32	Bacteria
Singleton	Med-Ae1-75mDCM-C302	11286	34.33	Bacteria
Singleton	Med-OCT2015-30m-C870	16021	34.33	Bacteria
Singleton	Med-Io17-3500mDeep-C1238	18766	34.34	Bacteria
Singleton	Med-Io16-70mDCM-C131	19694	34.42	Bacteria
Singleton	Med-Io7-77mDCM-C459	27391	34.42	Bacteria
Singleton	Med-OCT2015-75m-C52	71782	34.42	Bacteria
Singleton	Med-SEP2014-15m-C2309	11747	34.43	Bacteria
Singleton	Med-Ae2-600mDeep-C257	24324	34.45	Bacteria
Singleton	MedDCM-SEP2013-C380	14460	34.45	Bacteria
Singleton	Med-Io17-3500mDeep-C1453	16994	34.45	Bacteria
Singleton	Med-SEP2014-30m-C67	67382	34.46	Bacteria
Singleton	MedDCM-OCT2015-60m-C1541	12385	34.48	Bacteria
Singleton	Med-SEP2014-15m-C1040	18810	34.49	Bacteria
Singleton	MedDCM-SEP2014-C262	30297	34.49	Bacteria
Singleton	Med-SEP2014-15m-C1084	18449	34.52	Bacteria
Singleton	MedDCM-JUL2012-C795	14653	34.53	Bacteria
Singleton	Med-OCT2015-30m-C565	19391	34.56	Bacteria
Singleton	Med-Io7-77mDCM-C2061	11112	34.58	Bacteria
Singleton	MedDCM-SEP2013-LF-C2	18284	34.58	Bacteria
Singleton	Med-OCT2015-30m-C1353	12821	34.58	Bacteria
Singleton	Med-Io16-70mDCM-C157	13369	34.61	Bacteria
Singleton	Med-Ae2-600mDeep-C240	25158	34.65	Bacteria
Singleton	Med-OCT2015-30m-C1268	13202	34.65	Bacteria
Singleton	Med-OCT2015-30m-C989	14940	34.66	Bacteria
Singleton	Med-Io17-3500mDeep-C774	27071	34.67	Bacteria
Singleton	Med-OCT2015-30m-C858	16124	34.68	Bacteria
Singleton	Med-OCT2015-1000m-C1745	10198	34.7	Bacteria
Singleton	Med-Io7-77mDCM-C2196	10669	34.75	Bacteria
Singleton	MedDCM-SEP2014-C535	20477	34.77	Bacteria
Singleton	Med-Io7-77mDCM-C813	17956	34.79	Bacteria
Singleton	Med-Io16-70mDCM-C221	11470	34.82	Bacteria
Singleton	Med-OCT2015-30m-C424	22176	34.82	Bacteria
Singleton	Med-OCT2015-90m-C1256	14448	34.84	Bacteria
Singleton	Med-SEP2014-30m-C772	18169	34.86	Bacteria
Singleton	Med-OCT2015-90m-C1522	13095	34.88	Bacteria
Singleton	MedWinter-DEC2013-20m-C766	31256	34.89	Bacteria
Singleton	Med-Ae2-600mDeep-C171	30324	34.9	Bacteria
Singleton	Med-OCT2015-15m-C356	41737	34.92	Bacteria
Singleton	Med-OCT2015-90m-C149	39168	34.92	Bacteria
Singleton	Med-SEP2014-30m-C1190	14037	34.92	Bacteria
Singleton	Med-OCT2015-15m-C1913	17017	34.93	Bacteria
Singleton	Med-SEP2014-30m-C257	33624	34.93	Bacteria
Singleton	Med-OCT2015-30m-C642	18493	34.94	Bacteria
Singleton	MedDCM-SEP2014-C880	16144	34.94	Bacteria
Singleton	MedDCM-SEP2014-C551	20193	34.97	Bacteria
Singleton	Med-SEP2014-30m-C280	32458	34.98	Bacteria
Singleton	Med-Io17-3500mDeep-C1036	21364	34.99	Bacteria
Singleton	Med-Io7-77mDCM-C124	54585	35	Bacteria
Singleton	MedDCM-SEP2015_HS-C1265	20418	35.01	Bacteria
Singleton	Med-Io16-70mDCM-C95	17933	35.02	Bacteria
Singleton	Med-OCT2015-15m-C2441	14752	35.05	Bacteria
Singleton	Med-Ae2-600mDeep-C114	37191	35.06	Bacteria
Singleton	Med-Io17-3500mDeep-C1009	21858	35.07	Bacteria
Singleton	Med-Io7-77mDCM-C1299	13406	35.07	Bacteria
Singleton	Med-OCT2015-30m-C982	14958	35.07	Bacteria
Singleton	MedDCM-SEP2015_HS-C1235	20755	35.08	Bacteria
Singleton	Med-SEP2014-15m-C3007	10034	35.08	Bacteria
Singleton	Med-OCT2015-30m-C129	37918	35.09	Bacteria
Singleton	MedDCM-SEP2014-C1333	12523	35.11	Bacteria
Singleton	Med-Io7-77mDCM-C204	48069	35.12	Bacteria
Singleton	Med-SEP2014-30m-C979	15802	35.12	Bacteria
Singleton	MedDCM-SEP2013-C286	16596	35.15	Bacteria
Singleton	MedDCM-SEP2014-C403	24331	35.16	Bacteria
Singleton	Med-OCT2015-75m-C2188	11358	35.19	Bacteria
Singleton	Med-OCT2015-30m-C2151	10118	35.2	Bacteria
Singleton	Med-Io7-77mDCM-C374	37213	35.21	Bacteria
Singleton	Med-OCT2015-30m-C494	20578	35.21	Bacteria
Singleton	MedDCM-SEP2013-C112	29042	35.23	Bacteria
Singleton	Med-Io17-3500mDeep-C1304	18202	35.23	Bacteria
Singleton	Med-Io16-70mDCM-C37	27084	35.24	Bacteria
Singleton	Med-Io7-77mDCM-C262	33525	35.25	Bacteria
Singleton	Med-OCT2015-75m-C2539	10484	35.29	Bacteria
Singleton	Med-SEP2014-15m-C918	20012	35.3	Bacteria
Singleton	Med-SEP2014-15m-C1042	18806	35.31	Bacteria
Singleton	MedDCM-SEP2013-C670	10464	35.33	Bacteria
Singleton	Med-OCT2015-15m-C1694	18350	35.37	Bacteria
Singleton	Med-OCT2015-75m-C1425	14073	35.37	Bacteria
Singleton	Med-OCT2015-90m-C2118	11047	35.39	Bacteria
Singleton	MedDCM-SEP2015_HS-C197	53394	35.4	Bacteria
Singleton	MedDCM-SEP2013-C204	20264	35.42	Bacteria
Singleton	Med-OCT2015-30m-C1843	10969	35.44	Bacteria
Singleton	Med-OCT2015-90m-C1275	14316	35.44	Bacteria
Singleton	Med-Ae2-600mDeep-C942	11249	35.45	Bacteria
Singleton	Med-Io7-77mDCM-C193	44269	35.45	Bacteria
Singleton	Med-Io16-70mDCM-C19	36548	35.47	Bacteria
Singleton	Med-OCT2015-30m-C1065	14386	35.47	Bacteria
Singleton	MedDCM-SEP2013-C106	29866	35.48	Bacteria
Singleton	Med-OCT2015-30m-C753	17275	35.48	Bacteria
Singleton	MedDCM-SEP2013-C689	10261	35.49	Bacteria
Singleton	MedDCM-SEP2014-C1911	10100	35.49	Bacteria
Singleton	Med-OCT2015-15m-C1194	22625	35.5	Bacteria
Singleton	Med-SEP2014-15m-C1361	16119	35.51	Bacteria
Singleton	MedDCM-OCT2015-60m-C1652	11969	35.53	Bacteria
Singleton	MedDCM-SEP2015_HS-C501	33539	35.53	Bacteria
Singleton	MedDCM-SEP2015_HS-C1100	22201	35.55	Bacteria
Singleton	Med-OCT2015-90m-C2402	10305	35.57	Bacteria
Singleton	Med-SEP2014-15m-C1087	18431	35.57	Bacteria
Singleton	MedWinter-DEC2013-20m-C2965	13251	35.58	Bacteria
Singleton	MedDCM-OCT2015-60m-C1073	14850	35.6	Bacteria
Singleton	MedDCM-SEP2015_HS-C1027	22951	35.6	Bacteria
Singleton	Med-OCT2015-90m-C327	28342	35.62	Bacteria
Singleton	Med-Ae2-600mDeep-C170	30363	35.63	Bacteria
Singleton	Med-OCT2015-30m-C903	15677	35.63	Bacteria
Singleton	Med-OCT2015-90m-C1736	12243	35.64	Bacteria
Singleton	Med-SEP2014-30m-C1234	13675	35.66	Bacteria
Singleton	Med-Ae1-75mDCM-C10	166948	35.68	Bacteria
Singleton	Med-OCT2015-30m-C1651	11649	35.71	Bacteria
Singleton	Med-OCT2015-30m-C1728	11356	35.72	Bacteria
Singleton	MedDCM-SEP2015_HS-C420	36924	35.73	Bacteria
Singleton	MedDCM-SEP2015_HS-C4282	10315	35.75	Bacteria
Singleton	Med-OCT2015-30m-C1360	12768	35.77	Bacteria
Singleton	Med-OCT2015-30m-C974	15056	35.79	Bacteria
Singleton	Med-Io7-77mDCM-C1367	12918	35.83	Bacteria
Singleton	MedDCM-SEP2015_HS-C235	48915	35.84	Bacteria
Singleton	MedDCM-SEP2014-C124	40894	35.84	Bacteria
Singleton	Med-OCT2015-30m-C246	28125	35.85	Bacteria
Singleton	Med-SEP2014-30m-C1537	11995	35.85	Bacteria
Singleton	Med-Ae2-600mDeep-C742	13081	35.87	Bacteria
Singleton	MedDCM-SEP2015_HS-C1275	20364	35.88	Bacteria
Singleton	MedDCM-SEP2014-C697	17973	35.89	Bacteria
Singleton	Med-OCT2015-30m-C1083	14273	35.91	Bacteria
Singleton	MedDCM-SEP2015_HS-C71	81277	35.97	Bacteria
Singleton	MedDCM-SEP2013-C387	14339	35.99	Bacteria
Singleton	Med-Io16-70mDCM-C175	12907	36.03	Bacteria
Singleton	Med-OCT2015-30m-C1195	13598	36.05	Bacteria
Singleton	Med-OCT2015-30m-C1689	11478	36.06	Bacteria
Singleton	Med-Io16-70mDCM-C97	17601	36.09	Bacteria
Singleton	Med-SEP2014-30m-C1193	14024	36.1	Bacteria
Singleton	Med-OCT2015-30m-C1286	13129	36.11	Bacteria
Singleton	Med-SEP2014-15m-C675	24013	36.11	Bacteria
Singleton	MedDCM-SEP2013-C296	16388	36.12	Bacteria
Singleton	Med-Io7-77mDCM-C1935	10370	36.12	Bacteria
Singleton	Med-OCT2015-75m-C788	19036	36.12	Bacteria
Singleton	Med-Io16-70mDCM-C106	16854	36.13	Bacteria
Singleton	Med-OCT2015-30m-C91	44225	36.14	Bacteria
Singleton	Med-Ae2-600mDeep-C13	94790	36.19	Bacteria
Singleton	Med-OCT2015-15m-C4563	10107	36.19	Bacteria
Singleton	Med-Io7-77mDCM-C1383	17294	36.2	Bacteria
Singleton	Med-Io17-3500mDeep-C2319	12155	36.22	Bacteria
Singleton	Med-Io16-70mDCM-C94	18108	36.25	Bacteria
Singleton	Med-Io17-3500mDeep-C1392	17507	36.26	Bacteria
Singleton	Med-Ae2-600mDeep-C120	36020	36.29	Bacteria
Singleton	Med-SEP2014-15m-C1987	12867	36.29	Bacteria
Singleton	Med-Io16-70mDCM-C140	14314	36.3	Bacteria
Singleton	MedDCM-SEP2014-C913	15813	36.3	Bacteria
Singleton	MedDCM-OCT2015-60m-C1268	13769	36.31	Bacteria
Singleton	Med-OCT2015-30m-C107	40708	36.33	Bacteria
Singleton	MedDCM-OCT2015-60m-C2075	10710	36.34	Bacteria
Singleton	MedDCM-SEP2015_HS-C4023	10693	36.34	Bacteria
Singleton	Med-OCT2015-90m-C364	27199	36.34	Bacteria
Singleton	Med-Io17-3500mDeep-C1618	15649	36.35	Bacteria
Singleton	Med-Io7-77mDCM-C860	17350	36.35	Bacteria
Singleton	Med-Io7-77mDCM-C1461	12384	36.43	Bacteria
Singleton	MedDCM-SEP2014-C1432	11966	36.44	Bacteria
Singleton	Med-OCT2015-90m-C2055	11212	36.48	Bacteria
Singleton	Med-Ae2-600mDeep-C474	17364	36.51	Bacteria
Singleton	Med-OCT2015-30m-C1592	11839	36.51	Bacteria
Singleton	MedDCM-SEP2015_HS-C2979	12649	36.53	Bacteria
Singleton	MedDCM-SEP2015_HS-C4423	10137	36.54	Bacteria
Singleton	Med-SEP2014-15m-C1334	16385	36.54	Bacteria
Singleton	MedDCM-JUL2012-C215	33995	36.55	Bacteria
Singleton	MedDCM-SEP2015_HS-C2217	14925	36.56	Bacteria
Singleton	MedDCM-SEP2015_HS-C2891	12866	36.56	Bacteria
Singleton	MedDCM-OCT2015-60m-C1180	14254	36.57	Bacteria
Singleton	Med-OCT2015-30m-C623	18728	36.57	Bacteria
Singleton	MedDCM-SEP2015_HS-C1199	21104	36.59	Bacteria
Singleton	Med-OCT2015-75m-C2568	10414	36.6	Bacteria
Singleton	Med-OCT2015-30m-C1820	11030	36.65	Bacteria
Singleton	MedDCM-SEP2015_HS-C3142	12286	36.66	Bacteria
Singleton	Med-OCT2015-30m-C1053	14468	36.66	Bacteria
Singleton	MedDCM-OCT2015-60m-C1586	12209	36.69	Bacteria
Singleton	MedDCM-SEP2014-C919	15776	36.69	Bacteria
Singleton	MedDCM-SEP2015_HS-C2716	13227	36.7	Bacteria
Singleton	MedDCM-SEP2014-C278	29520	36.71	Bacteria
Singleton	Med-Io7-77mDCM-C1964	10259	36.73	Bacteria
Singleton	Med-Io7-77mDCM-C2188	11758	36.74	Bacteria
Singleton	MedDCM-SEP2015_HS-C854	25374	36.74	Bacteria
Singleton	Med-OCT2015-15m-C347	42072	36.76	Bacteria
Singleton	Med-Io7-77mDCM-C1064	15242	36.77	Bacteria
Singleton	Med-SEP2014-30m-C883	16750	36.77	Bacteria
Singleton	Med-OCT2015-15m-C467	36932	36.78	Bacteria
Singleton	Med-Ae2-600mDeep-C404	19019	36.82	Bacteria
Singleton	Med-OCT2015-15m-C179	55096	36.86	Bacteria
Singleton	Med-OCT2015-15m-C3011	13071	36.88	Bacteria
Singleton	Med-OCT2015-90m-C1337	13994	36.89	Bacteria
Singleton	Med-Ae2-600mDeep-C11	109231	36.91	Bacteria
Singleton	Med-SEP2014-15m-C220	43568	36.91	Bacteria
Singleton	Med-Io7-77mDCM-C2272	11320	36.92	Bacteria
Singleton	MedDCM-SEP2013-C691	10245	36.94	Bacteria
Singleton	Med-Io16-70mDCM-C291	10719	36.94	Bacteria
Singleton	Med-Ae2-600mDeep-C606	14924	36.96	Bacteria
Singleton	Med-Io7-77mDCM-C92	61024	36.96	Bacteria
Singleton	MedDCM-SEP2015_HS-C284	44659	36.96	Bacteria
Singleton	MedWinter-DEC2013-20m-C4249	10331	36.97	Bacteria
Singleton	Med-Io16-70mDCM-C2	96129	36.97	Bacteria
Singleton	Med-Io7-77mDCM-C564	25171	36.97	Bacteria
Singleton	Med-OCT2015-15m-C481	36322	36.97	Bacteria
Singleton	Med-OCT2015-30m-C911	15593	37	Bacteria
Singleton	Med-OCT2015-30m-C184	32594	37.01	Bacteria
Singleton	Med-Io17-3500mDeep-C809	26140	37.04	Bacteria
Singleton	Med-SEP2014-15m-C280	38218	37.04	Bacteria
Singleton	Med-Io7-77mDCM-C160	46060	37.05	Bacteria
Singleton	Med-Io17-3500mDeep-C2982	10035	37.06	Bacteria
Singleton	Med-OCT2015-30m-C943	15236	37.06	Bacteria
Singleton	MedDCM-OCT2015-60m-C1127	14515	37.09	Bacteria
Singleton	Med-SEP2014-30m-C1754	11104	37.09	Bacteria
Singleton	Med-Io7-77mDCM-C935	38648	37.1	Bacteria
Singleton	Med-Io16-70mDCM-C163	13247	37.11	Bacteria
Singleton	Med-OCT2015-30m-C252	27794	37.11	Bacteria
Singleton	MedDCM-SEP2013-C562	11553	37.13	Bacteria
Singleton	Med-Io7-77mDCM-C1999	12675	37.14	Bacteria
Singleton	MedDCM-SEP2015_HS-C2116	15250	37.15	Bacteria
Singleton	Med-OCT2015-15m-C2814	13543	37.15	Bacteria
Singleton	Med-OCT2015-30m-C1732	11349	37.18	Bacteria
Singleton	Med-Io7-77mDCM-C361	28302	37.2	Bacteria
Singleton	Med-Ae2-600mDeep-C1057	10370	37.22	Bacteria
Singleton	Med-Io16-70mDCM-C6	53023	37.22	Bacteria
Singleton	MedDCM-JUL2012-C1036	12588	37.24	Bacteria
Singleton	MedDCM-SEP2015_HS-C4211	10420	37.26	Bacteria
Singleton	Med-OCT2015-30m-C1063	14404	37.27	Bacteria
Singleton	MedDCM-SEP2015_HS-C243	48199	37.33	Bacteria
Singleton	Med-SEP2014-30m-C326	30008	37.33	Bacteria
Singleton	MedDCM-SEP2014-C1603	11199	37.33	Bacteria
Singleton	Med-OCT2015-30m-C1629	11710	37.34	Bacteria
Singleton	Med-Io7-77mDCM-C1543	11956	37.35	Bacteria
Singleton	Med-SEP2014-30m-C203	37798	37.35	Bacteria
Singleton	MedDCM-SEP2015_HS-C955	23791	37.38	Bacteria
Singleton	Med-OCT2015-30m-C1540	12032	37.38	Bacteria
Singleton	Med-Ae1-75mDCM-C305	11255	37.39	Bacteria
Singleton	MedDCM-SEP2015_HS-C126	65805	37.4	Bacteria
Singleton	Med-SEP2014-30m-C1825	10883	37.4	Bacteria
Singleton	MedDCM-SEP2013-C221	19020	37.42	Bacteria
Singleton	MedDCM-SEP2013-C624	10930	37.43	Bacteria
Singleton	MedDCM-SEP2014-C173	36445	37.48	Bacteria
Singleton	Med-Io7-77mDCM-C1402	20808	37.49	Bacteria
Singleton	Med-OCT2015-15m-C3059	12946	37.49	Bacteria
Singleton	Med-OCT2015-30m-C1744	11309	37.55	Bacteria
Singleton	MedDCM-SEP2014-C1053	14467	37.55	Bacteria
Singleton	Med-Io16-70mDCM-C107	16710	37.56	Bacteria
Singleton	Med-Io16-70mDCM-C258	10712	37.56	Bacteria
Singleton	Med-Io7-77mDCM-C1548	12236	37.57	Bacteria
Singleton	Med-OCT2015-30m-C1656	11613	37.61	Bacteria
Singleton	MedDCM-SEP2014-C255	30731	37.64	Bacteria
Singleton	Med-OCT2015-15m-C141	59724	37.65	Bacteria
Singleton	Med-SEP2014-15m-C595	25404	37.66	Bacteria
Singleton	MedDCM-OCT2015-60m-C980	15643	37.72	Bacteria
Singleton	Med-OCT2015-30m-C1116	14080	37.81	Bacteria
Singleton	Med-Io16-70mDCM-C116	15998	37.85	Bacteria
Singleton	Med-SEP2014-30m-C2084	10002	37.85	Bacteria
Singleton	Med-Ae2-600mDeep-C848	12048	37.93	Bacteria
Singleton	Med-Ae2-600mDeep-C788	12607	37.96	Bacteria
Singleton	MedWinter-JAN2015-20m-LF-C216	14903	37.99	Bacteria
Singleton	Med-OCT2015-30m-C1877	10851	38.06	Bacteria
Singleton	Med-Io16-70mDCM-C79	19283	38.07	Bacteria
Singleton	Med-SEP2014-15m-C2020	12752	38.14	Bacteria
Singleton	Med-Io7-77mDCM-C2081	16346	38.17	Bacteria
Singleton	MedDCM-SEP2015_HS-C1287	20302	38.18	Bacteria
Singleton	Med-OCT2015-15m-C27	111585	38.29	Bacteria
Singleton	Med-Ae2-600mDeep-C709	13491	38.34	Bacteria
Singleton	MedWinter-DEC2013-20m-C2635	14276	38.35	Bacteria
Singleton	Med-Ae2-600mDeep-C263	24070	38.37	Bacteria
Singleton	Med-Io7-77mDCM-C880	17046	38.37	Bacteria
Singleton	MedWinter-JAN2015-CoastalC753	10875	38.4	Bacteria
Singleton	Med-OCT2015-30m-C468	21105	38.51	Bacteria
Singleton	Med-OCT2015-75m-C904	17656	38.51	Bacteria
Singleton	Med-Io16-70mDCM-C18	38206	38.52	Bacteria
Singleton	Med-Io7-77mDCM-C955	32805	38.62	Bacteria
Singleton	Med-OCT2015-30m-C167	33936	38.62	Bacteria
Singleton	MedDCM-SEP2015_HS-C2512	13837	38.67	Bacteria
Singleton	Med-SEP2014-15m-C470	29300	38.67	Bacteria
Singleton	Med-Io7-77mDCM-C699	19295	38.69	Bacteria
Singleton	MedDCM-SEP2013-C220	19107	38.71	Bacteria
Singleton	Med-Io16-70mDCM-C220	11523	38.72	Bacteria
Singleton	Med-Io16-70mDCM-C40	25735	38.73	Bacteria
Singleton	Med-SEP2014-30m-C986	15719	38.74	Bacteria
Singleton	MedDCM-SEP2014-C472	22362	38.74	Bacteria
Singleton	Med-Ae2-600mDeep-C217	26259	38.77	Bacteria
Singleton	Med-Ae2-600mDeep-C597	15113	38.77	Bacteria
Singleton	Med-OCT2015-15m-C80	76109	38.8	Bacteria
Singleton	Med-SEP2014-30m-C1700	11313	38.8	Bacteria
Singleton	Med-OCT2015-30m-C2092	10268	38.81	Bacteria
Singleton	Med-SEP2014-30m-C226	35275	38.83	Bacteria
Singleton	Med-Io7-77mDCM-C31	116262	38.9	Bacteria
Singleton	Med-SEP2014-15m-C710	23361	38.93	Bacteria
Singleton	Med-Io7-77mDCM-C1572	11821	38.97	Bacteria
Singleton	MedDCM-SEP2014-C471	22394	38.97	Bacteria
Singleton	MedDCM-SEP2015_HS-C2404	14201	39.09	Bacteria
Singleton	Med-SEP2014-30m-C530	22250	39.09	Bacteria
Singleton	Med-Io7-77mDCM-C147	47852	39.11	Bacteria
Singleton	MedDCM-SEP2015_HS-C364	39314	39.12	Bacteria
Singleton	MedDCM-SEP2014-C1087	14158	39.14	Bacteria
Singleton	Med-Ae2-600mDeep-C122	35706	39.19	Bacteria
Singleton	Med-Io7-77mDCM-C732	18858	39.21	Bacteria
Singleton	Med-Io7-77mDCM-C2054	19395	39.24	Bacteria
Singleton	MedDCM-SEP2013-LF-C3	16519	39.25	Bacteria
Singleton	MedDCM-SEP2015_HS-C293	43923	39.28	Bacteria
Singleton	Med-SEP2014-30m-C87	57089	39.28	Bacteria
Singleton	Med-Ae2-600mDeep-C129	35091	39.35	Bacteria
Singleton	Med-Ae2-600mDeep-C267	23715	39.38	Bacteria
Singleton	Med-Io7-77mDCM-C63	75698	39.41	Bacteria
Singleton	Med-Io17-3500mDeep-C288	55463	39.42	Bacteria
Singleton	Med-OCT2015-30m-C1265	13217	39.45	Bacteria
Singleton	Med-SEP2014-15m-C1115	18243	39.45	Bacteria
Singleton	Med-Io17-3500mDeep-C2901	10272	39.52	Bacteria
Singleton	Med-OCT2015-15m-C1837	17483	39.57	Bacteria
Singleton	Med-Ae2-600mDeep-C543	16111	39.66	Bacteria
Singleton	Med-Io16-70mDCM-C241	11040	39.8	Bacteria
Singleton	Med-OCT2015-15m-C3103	12804	39.82	Bacteria
Singleton	Med-Ae1-75mDCM-C269	12200	39.83	Bacteria
Singleton	Med-OCT2015-30m-C42	57593	39.86	Bacteria
Singleton	Med-Io7-77mDCM-C2288	11914	39.87	Bacteria
Singleton	Med-Ae1-75mDCM-C50	39551	39.89	Bacteria
Singleton	MedWinter-JAN2015-20m-LF-C106	22427	39.94	Bacteria
Singleton	Med-SEP2014-15m-C1068	18595	39.96	Bacteria
Singleton	MedDCM-SEP2015_HS-C4309	10277	39.99	Bacteria
Singleton	Med-OCT2015-1000m-C1776	10102	40.01	Bacteria
Singleton	Med-SEP2014-30m-C1708	11293	40.07	Bacteria
Singleton	Med-Io17-3500mDeep-C1602	15761	40.1	Bacteria
Singleton	Med-Io17-3500mDeep-C1143	19946	40.13	Bacteria
Singleton	Med-Io7-77mDCM-C487	23502	40.21	Bacteria
Singleton	Med-OCT2015-1000m-C521	20019	40.24	Bacteria
Singleton	Med-Io7-77mDCM-C301	31028	40.3	Bacteria
Singleton	Med-OCT2015-30m-C1845	10955	40.3	Bacteria
Singleton	Med-Io17-3500mDeep-C2410	11794	40.36	Bacteria
Singleton	Med-Io7-77mDCM-C523	22562	40.42	Bacteria
Singleton	Med-OCT2015-15m-C2034	16485	40.42	Bacteria
Singleton	MedDCM-SEP2014-C1515	11569	40.42	Bacteria
Singleton	Med-Io17-3500mDeep-C1375	17609	40.57	Bacteria
Singleton	Med-Io7-77mDCM-C2314	10370	40.69	Bacteria
Singleton	MedDCM-SEP2015_HS-C4026	10691	40.7	Bacteria
Singleton	Med-OCT2015-30m-C299	25660	40.7	Bacteria
Singleton	Med-OCT2015-30m-C370	23408	40.73	Bacteria
Singleton	Med-SEP2014-15m-C700	23535	40.73	Bacteria
Singleton	Med-Io17-3500mDeep-C2509	11422	40.79	Bacteria
Singleton	Med-OCT2015-30m-C506	20304	40.79	Bacteria
Singleton	Med-OCT2015-30m-C74	48962	40.85	Bacteria
Singleton	Med-SEP2014-30m-C507	22945	40.88	Bacteria
Singleton	Med-Io17-3500mDeep-C2005	13429	40.99	Bacteria
Singleton	Med-OCT2015-30m-C76	48762	41	Bacteria
Singleton	Med-OCT2015-30m-C1001	14836	41.05	Bacteria
Singleton	Med-OCT2015-30m-C29	70200	41.13	Bacteria
Singleton	MedDCM-SEP2015_HS-C1087	22316	41.15	Bacteria
Singleton	Med-Io7-77mDCM-C519	29186	41.16	Bacteria
Singleton	MedWinter-DEC2013-20m-C2453	14924	41.23	Bacteria
Singleton	Med-Io16-70mDCM-C281	10326	41.23	Bacteria
Singleton	Med-OCT2015-15m-C2834	13506	41.23	Bacteria
Singleton	Med-Io7-77mDCM-C146	51837	41.38	Bacteria
Singleton	Med-OCT2015-30m-C1515	12141	41.41	Bacteria
Singleton	Med-OCT2015-30m-C214	30596	41.42	Bacteria
Singleton	MedDCM-SEP2014-C952	15440	41.42	Bacteria
Singleton	MedWinter-JAN2015-80m-C493	14251	41.47	Bacteria
Singleton	Med-OCT2015-15m-C497	35522	41.55	Bacteria
Singleton	MedWinter-JAN2015-80m-C317	18792	41.62	Bacteria
Singleton	Med-SEP2014-15m-C2665	10773	41.65	Bacteria
Singleton	Med-SEP2014-15m-C1789	13713	41.7	Bacteria
Singleton	Med-SEP2014-30m-C1117	14637	41.76	Bacteria
Singleton	Med-Io17-3500mDeep-C512	36382	41.8	Bacteria
Singleton	Med-Io7-77mDCM-C2185	10021	41.83	Bacteria
Singleton	Med-SEP2014-15m-C141	55257	41.83	Bacteria
Singleton	MedDCM-SEP2014-C263	30286	41.83	Bacteria
Singleton	Med-OCT2015-15m-C659	30655	41.87	Bacteria
Singleton	Med-OCT2015-15m-C2059	16391	42.04	Bacteria
Singleton	MedDCM-SEP2014-C980	15171	42.05	Bacteria
Singleton	Med-Io17-3500mDeep-C2187	12715	42.08	Bacteria
Singleton	Med-OCT2015-75m-C37	82209	42.46	Bacteria
Singleton	MedWinter-JAN2015-80m-C696	11553	42.47	Bacteria
Singleton	MedWinter-DEC2013-20m-C4192	10434	42.51	Bacteria
Singleton	Med-OCT2015-75m-C501	23990	42.53	Bacteria
Singleton	Med-Io17-3500mDeep-C920	23715	42.56	Bacteria
Singleton	Med-SEP2014-15m-C511	27372	42.63	Bacteria
Singleton	MedDCM-SEP2014-C30	74075	42.8	Bacteria
Singleton	MedDCM-SEP2014-C622	18994	43.29	Bacteria
Singleton	MedDCM-SEP2014-C1646	11071	43.38	Bacteria
Singleton	MedDCM-SEP2014-C1528	11506	43.47	Bacteria
Singleton	Med-SEP2014-15m-C1360	16129	43.53	Bacteria
Singleton	MedDCM-SEP2014-C1752	10621	43.59	Bacteria
Singleton	Med-OCT2015-15m-C2998	13098	43.62	Bacteria
Singleton	Med-OCT2015-1000m-C1799	10019	43.64	Bacteria
Singleton	Med-Io7-77mDCM-C186	41793	43.8	Bacteria
Singleton	MedDCM-SEP2015_HS-C3172	12199	43.88	Bacteria
Singleton	Med-SEP2014-15m-C457	29836	44.12	Bacteria
Singleton	MedDCM-SEP2013-C569	11498	44.62	Bacteria
Singleton	MedDCM-SEP2013-C332	15345	44.74	Bacteria
Singleton	Med-Io17-3500mDeep-C1584	15906	45.13	Bacteria
Singleton	MedDCM-SEP2014-C892	16015	45.21	Bacteria
Singleton	MedDCM-SEP2014-C662	18405	45.34	Bacteria
Singleton	Med-SEP2014-30m-C1835	10833	45.45	Bacteria
Singleton	Med-SEP2014-15m-C2592	10966	45.5	Bacteria
Singleton	Med-OCT2015-15m-C4608	10045	45.8	Bacteria
Singleton	Med-Io17-3500mDeep-C822	25968	46.13	Bacteria
Singleton	Med-Io7-77mDCM-C442	24702	46.14	Bacteria
Singleton	MedDCM-SEP2013-C666	10490	46.4	Bacteria
Singleton	MedDCM-SEP2013-C698	10166	46.77	Bacteria
Singleton	MedDCM-SEP2015_HS-C415	37158	46.83	Bacteria
Singleton	Med-OCT2015-15m-C1850	17386	47.11	Bacteria
Singleton	MedDCM-SEP2013-C257	17411	47.15	Bacteria
Singleton	Med-SEP2014-15m-C1901	13183	47.32	Bacteria
Singleton	Med-Ae1-75mDCM-C124	20746	47.34	Bacteria
Singleton	Med-SEP2014-15m-C2029	12725	47.47	Bacteria
Singleton	Med-SEP2014-30m-C212	36623	47.58	Bacteria
Singleton	Med-OCT2015-15m-C2718	13809	47.74	Bacteria
Singleton	Med-OCT2015-15m-C1448	20205	47.76	Bacteria
Singleton	MedDCM-SEP2014-C1458	11849	48.02	Bacteria
Singleton	Med-OCT2015-2000m-C282	59668	48.08	Bacteria
Singleton	Med-OCT2015-15m-C2754	13709	48.17	Bacteria
Singleton	MedDCM-SEP2013-C419	13725	48.28	Bacteria
Singleton	Med-Ae1-75mDCM-C340	10484	49.21	Bacteria
Singleton	MedWinter-JAN2015-20m-LF-C76	26890	51.39	Bacteria
Singleton	Med-OCT2015-15m-C3834	11230	51.53	Bacteria
Singleton	Med-Io17-3500mDeep-C1659	15365	53.45	Bacteria
Singleton	Med-Io17-3500mDeep-C431	41401	54.02	Bacteria
Singleton	Med-Ae2-600mDeep-C604	14939	55.14	Bacteria
Singleton	Med-Ae2-600mDeep-C710	13489	55.53	Bacteria

## Sheet: Hoja2
Ae1-C10	35.68	166948
Ae1-C11	37.04	127314
Ae1-C31	32.8	61451
Ae1-C50	39.89	39551
Ae1-C53	32.19	37889
Ae1-C67	37.15	30877
Ae1-C74	32.17	29448
Ae1-C85	35.14	26673
Ae1-C104	32.85	24458
Ae1-C112	36.35	22492
Ae1-C124	47.34	20746
Ae1-C132	35.64	19709
Ae1-C142	33.04	18740
Ae1-C186	34.63	15654
Ae1-C190	37.74	15321
Ae1-C219	35.17	14289
Ae1-C221	36.15	14259
Ae1-C237	35.79	13504
Ae1-C239	36.49	13394
Ae1-C240	32.94	13364
Ae1-C248	33.82	13133
Ae1-C269	39.83	12200
Ae1-C296	37.6	11472
Ae1-C302	34.33	11286
Ae1-C305	37.39	11255
Ae1-C306	33.61	11146
Ae1-C308	31.63	11122
Ae1-C319	35.99	10838
Ae1-C332	36.68	10597
Ae1-C340	49.21	10484
Ae2-C11	36.91	109231
Ae2-C13	36.19	94790
Ae2-C46	31.3	64894
Ae2-C89	35.94	43595
Ae2-C93	32.77	43016
Ae2-C114	35.06	37191
Ae2-C120	36.29	36020
Ae2-C122	39.19	35706
Ae2-C129	39.35	35091
Ae2-C170	35.63	30363
Ae2-C171	34.9	30324
Ae2-C217	38.77	26259
Ae2-C240	34.65	25158
Ae2-C257	34.45	24324
Ae2-C263	38.37	24070
Ae2-C267	39.38	23715
Ae2-C327	34.32	21183
Ae2-C331	30.81	21078
Ae2-C404	36.82	19019
Ae2-C474	36.51	17364
Ae2-C519	34.3	16573
Ae2-C543	39.66	16111
Ae2-C597	38.77	15113
Ae2-C604	55.14	14939
Ae2-C606	36.96	14924
Ae2-C709	38.34	13491
Ae2-C710	55.53	13489
Ae2-C742	35.87	13081
Ae2-C788	37.96	12607
Ae2-C848	37.93	12048
Ae2-C879	33.91	11786
Ae2-C942	35.45	11249
Ae2-C1057	37.22	10370
Ae2-C1059	32.79	10368
dcm2012-C7	35.94	154128
dcm2012-C215	36.55	33995
dcm2012-C315	35.85	30990
dcm2012-C367	38.25	25077
dcm2012-C420	41.36	50535
dcm2012-C506	38.98	19864
dcm2012-C795	34.53	14653
dcm2012-C1036	37.24	12588
dcm2012-C1060	32.26	13966
dcm2012-C1092	39.82	13077
dcm2012-C1169	32.03	12216
dcm2012-C1264	36.88	16309
dcm2012-C1266	34.05	13955
dcm2012-C1439	36.57	16663
dcm2012-C1612	36.68	11052
dcm2012-C1625	39.27	11748
dcm2013-C1	35.74	130495
dcm2013-C13	32.82	68578
dcm2013-C56	31.61	37952
dcm2013-C63	36.4	36255
dcm2013-C80	34.64	33498
dcm2013-C87	31.27	32442
dcm2013-C106	35.48	29866
dcm2013-C109	39.69	29175
dcm2013-C112	35.23	29042
dcm2013-C151	35.72	24375
dcm2013-C188	39.2	20994
dcm2013-C191	39.11	20902
dcm2013-C204	35.42	20264
dcm2013-C210	36.83	19937
dcm2013-C220	38.71	19107
dcm2013-C221	37.42	19020
dcm2013-C251	33.76	17829
dcm2013-C257	47.15	17411
dcm2013-C264	37.27	17235
dcm2013-C282	38.31	16712
dcm2013-C286	35.15	16596
dcm2013-C289	39.14	16556
dcm2013-C294	35.19	16444
dcm2013-C296	36.12	16388
dcm2013-C317	40.85	15790
dcm2013-C332	44.74	15345
dcm2013-C380	34.45	14460
dcm2013-C387	35.99	14339
dcm2013-C390	38.78	14272
dcm2013-C391	40.82	14265
dcm2013-C419	48.28	13725
dcm2013-C477	31.72	12732
dcm2013-C562	37.13	11553
dcm2013-C569	44.62	11498
dcm2013-C624	37.43	10930
dcm2013-C666	46.4	10490
dcm2013-C670	35.33	10464
dcm2013-C689	35.49	10261
dcm2013-C691	36.94	10245
dcm2013-C698	46.77	10166
dec13-20m-C17	42.26	188424
dec13-20m-C127	35.54	80042
dec13-20m-C138	36.75	77936
dec13-20m-C148	36.47	75809
dec13-20m-C160	39.16	74096
dec13-20m-C357	33.63	49224
dec13-20m-C593	38.84	36467
dec13-20m-C607	40.46	36133
dec13-20m-C659	39.42	34374
dec13-20m-C690	33.91	33524
dec13-20m-C714	37.8	32784
dec13-20m-C766	34.89	31256
dec13-20m-C816	41.69	30244
dec13-20m-C945	35.15	27581
dec13-20m-C948	31.86	27507
dec13-20m-C1312	35.6	22674
dec13-20m-C1370	30.54	22073
dec13-20m-C1414	41.39	21580
dec13-20m-C1440	35.15	21416
dec13-20m-C1527	30.54	20653
dec13-20m-C1744	34.12	18799
dec13-20m-C1746	31.73	18775
dec13-20m-C1828	37.11	18258
dec13-20m-C1875	34.25	18008
dec13-20m-C1970	35.27	17362
dec13-20m-C2351	33	15302
dec13-20m-C2405	34.14	15123
dec13-20m-C2453	41.23	14924
dec13-20m-C2628	32.38	14304
dec13-20m-C2631	36.26	14298
dec13-20m-C2635	38.35	14276
dec13-20m-C2701	35.55	14063
dec13-20m-C2728	40.55	13973
dec13-20m-C2965	35.58	13251
dec13-20m-C3133	34.84	12817
dec13-20m-C3252	36.64	12552
dec13-20m-C3267	33.96	12514
dec13-20m-C3306	34.19	12430
dec13-20m-C3341	35.97	12342
dec13-20m-C3379	34.12	12246
dec13-20m-C3694	32.83	11430
dec13-20m-C3759	35.43	11289
dec13-20m-C4101	32.3	10622
dec13-20m-C4119	36.54	10591
dec13-20m-C4192	42.51	10434
dec13-20m-C4249	36.97	10331
dec13-20m-C4261	32.53	10306
dec13-20m-C4350	32.38	10152
dec13-20m-C4391	34.59	10094
Io16-C1	37.4	103655
Io16-C2	36.97	96129
Io16-C3	34.3	91799
Io16-C5	33.74	58934
Io16-C6	37.22	53023
Io16-C7	34.21	52513
Io16-C8	32.94	50525
Io16-C10	34.3	44346
Io16-C15	32.41	61472
Io16-C18	38.52	38206
Io16-C19	35.47	36548
Io16-C20	37.18	65403
Io16-C22	34.1	32062
Io16-C23	36.81	31472
Io16-C24	34.03	31805
Io16-C26	37.57	30920
Io16-C27	30.59	30302
Io16-C35	33.49	28056
Io16-C36	36.06	27298
Io16-C37	35.24	27084
Io16-C39	34.35	25849
Io16-C40	38.73	25735
Io16-C45	33.23	24317
Io16-C46	33.07	23946
Io16-C49	33.69	42095
Io16-C54	33.14	21910
Io16-C58	34.89	21314
Io16-C63	37.85	20968
Io16-C64	33.49	20873
Io16-C69	35.57	20256
Io16-C78	35.1	19293
Io16-C79	38.07	19283
Io16-C84	38.71	18719
Io16-C87	36.56	18466
Io16-C88	41.88	18432
Io16-C94	36.25	18108
Io16-C95	35.02	17933
Io16-C97	36.09	17601
Io16-C98	35.31	17447
Io16-C105	36.35	16874
Io16-C106	36.13	16854
Io16-C107	37.56	16710
Io16-C116	37.85	15998
Io16-C121	32.06	15683
Io16-C127	34.97	16523
Io16-C131	34.42	19694
Io16-C132	37.88	14830
Io16-C140	36.3	14314
Io16-C144	34.02	14157
Io16-C148	36.89	14000
Io16-C152	35.15	13739
Io16-C157	34.61	13369
Io16-C163	37.11	13247
Io16-C173	32.21	13359
Io16-C175	36.03	12907
Io16-C185	36.04	14913
Io16-C200	31.85	12223
Io16-C202	32.35	12431
Io16-C205	35.72	11992
Io16-C213	33.9	11678
Io16-C220	38.72	11523
Io16-C221	34.82	11470
Io16-C235	39.05	11197
Io16-C239	32.52	11156
Io16-C241	39.8	11040
Io16-C249	34.65	10924
Io16-C258	37.56	10712
Io16-C259	36.84	10679
Io16-C261	35.96	10632
Io16-C263	34.28	10604
Io16-C279	32.6	10335
Io16-C281	41.23	10326
Io16-C291	36.94	10719
Io16-C319	35.12	15854
Io16-C320	31.6	21291
Io16-C321	32.55	11485
Io16-C328	32.34	23046
Io17-C288	39.42	55463
Io17-C421	32.55	42312
Io17-C431	54.02	41401
Io17-C512	41.8	36382
Io17-C518	30.92	36171
Io17-C537	32.12	35372
Io17-C774	34.67	27071
Io17-C809	37.04	26140
Io17-C822	46.13	25968
Io17-C920	42.56	23715
Io17-C1009	35.07	21858
Io17-C1036	34.99	21364
Io17-C1143	40.13	19946
Io17-C1238	34.34	18766
Io17-C1261	33.59	18526
Io17-C1304	35.23	18202
Io17-C1375	40.57	17609
Io17-C1392	36.26	17507
Io17-C1453	34.45	16994
Io17-C1584	45.13	15906
Io17-C1602	40.1	15761
Io17-C1618	36.35	15649
Io17-C1659	53.45	15365
Io17-C1703	29.38	15090
Io17-C1920	34.12	13855
Io17-C2005	40.99	13429
Io17-C2187	42.08	12715
Io17-C2319	36.22	12155
Io17-C2410	40.36	11794
Io17-C2509	40.79	11422
Io17-C2589	31.3	11114
Io17-C2877	30.65	10355
Io17-C2901	39.52	10272
Io17-C2982	37.06	10035
Io7-C14	39.01	159013
Io7-C19	37.22	131009
Io7-C23	39.27	143563
Io7-C26	39.6	133407
Io7-C29	37.81	145822
Io7-C31	38.9	116262
Io7-C40	33.11	103430
Io7-C45	39.22	119966
Io7-C60	36.68	76983
Io7-C63	39.41	75698
Io7-C86	41.21	61786
Io7-C88	34.57	60699
Io7-C92	36.96	61024
Io7-C116	32.05	70387
Io7-C124	35	54585
Io7-C127	37.29	104365
Io7-C146	41.38	51837
Io7-C147	39.11	47852
Io7-C160	37.05	46060
Io7-C185	37.59	46659
Io7-C186	43.8	41793
Io7-C193	35.45	44269
Io7-C204	35.12	48069
Io7-C226	39.57	37429
Io7-C228	32.83	37183
Io7-C239	33.45	35845
Io7-C262	35.25	33525
Io7-C264	39.25	33417
Io7-C281	38.63	57051
Io7-C301	40.3	31028
Io7-C302	32.27	30964
Io7-C305	30.7	30923
Io7-C311	34.78	69099
Io7-C361	37.2	28302
Io7-C374	35.21	37213
Io7-C388	38.85	26837
Io7-C401	32.11	26103
Io7-C442	46.14	24702
Io7-C445	35.21	24910
Io7-C459	34.42	27391
Io7-C460	38.23	24022
Io7-C487	40.21	23502
Io7-C519	41.16	29186
Io7-C523	40.42	22562
Io7-C526	38.02	42897
Io7-C564	36.97	25171
Io7-C571	35.37	21440
Io7-C662	35.69	19830
Io7-C697	33.36	22829
Io7-C699	38.69	19295
Io7-C732	39.21	18858
Io7-C776	35.56	18356
Io7-C784	34.8	23658
Io7-C813	34.79	17956
Io7-C822	34.2	27184
Io7-C860	36.35	17350
Io7-C880	38.37	17046
Io7-C885	29.97	16934
Io7-C935	37.1	38648
Io7-C955	38.62	32805
Io7-C956	33.59	34894
Io7-C1064	36.77	15242
Io7-C1115	37.97	23128
Io7-C1130	36.45	18086
Io7-C1137	35.16	14655
Io7-C1153	36.2	14560
Io7-C1203	38.22	14174
Io7-C1221	37.74	21991
Io7-C1274	38.26	13526
Io7-C1299	35.07	13406
Io7-C1315	38.34	13261
Io7-C1337	35.36	13081
Io7-C1367	35.83	12918
Io7-C1373	34.03	12877
Io7-C1383	36.2	17294
Io7-C1384	33.87	12839
Io7-C1402	37.49	20808
Io7-C1436	38.28	12873
Io7-C1461	36.43	12384
Io7-C1480	37	14801
Io7-C1543	37.35	11956
Io7-C1548	37.57	12236
Io7-C1572	38.97	11821
Io7-C1582	33.52	12749
Io7-C1612	33.75	25861
Io7-C1663	33.83	12993
Io7-C1808	33.35	10835
Io7-C1879	37.41	11728
Io7-C1890	33.16	10683
Io7-C1934	33.4	10373
Io7-C1935	36.12	10370
Io7-C1964	36.73	10259
Io7-C1972	35.23	10214
Io7-C1999	37.14	12675
Io7-C2054	39.24	19395
Io7-C2061	34.58	11112
Io7-C2068	37.96	19047
Io7-C2081	38.17	16346
Io7-C2168	36.64	10576
Io7-C2169	33.51	10599
Io7-C2185	41.83	10021
Io7-C2188	36.74	11758
Io7-C2196	34.75	10669
Io7-C2247	32.59	11320
Io7-C2272	36.92	11320
Io7-C2278	32.3	11010
Io7-C2279	33.51	11928
Io7-C2288	39.87	11914
Io7-C2314	40.69	10370
MedDCM13-LF-C1	33.13	19720
MedDCM13-LF-C2	34.58	18284
MedDCM13-LF-C3	39.25	16519
MedDCM13-LF-C5	35.22	15144
MedDCM13-LF-C8	32.17	14422
MedDCM-OCT2015-60m-C4	37.71	196757
MedDCM-OCT2015-60m-C19	37.29	105202
MedDCM-OCT2015-60m-C24	32.09	95347
MedDCM-OCT2015-60m-C28	33.51	93140
MedDCM-OCT2015-60m-C96	30.19	50157
MedDCM-OCT2015-60m-C132	36.4	41636
MedDCM-OCT2015-60m-C133	33.27	41537
MedDCM-OCT2015-60m-C172	32.76	36363
MedDCM-OCT2015-60m-C184	32.38	35140
MedDCM-OCT2015-60m-C189	33.06	34889
MedDCM-OCT2015-60m-C225	34.41	31278
MedDCM-OCT2015-60m-C242	37.54	30651
MedDCM-OCT2015-60m-C273	34.41	29132
MedDCM-OCT2015-60m-C295	32.62	28404
MedDCM-OCT2015-60m-C327	33.82	27279
MedDCM-OCT2015-60m-C370	36.36	25145
MedDCM-OCT2015-60m-C380	36.6	24740
MedDCM-OCT2015-60m-C381	37.04	24738
MedDCM-OCT2015-60m-C470	31.83	22707
MedDCM-OCT2015-60m-C586	34.41	20506
MedDCM-OCT2015-60m-C774	36.11	17755
MedDCM-OCT2015-60m-C820	30.29	17216
MedDCM-OCT2015-60m-C836	32.65	17045
MedDCM-OCT2015-60m-C980	37.72	15643
MedDCM-OCT2015-60m-C1040	30.31	15126
MedDCM-OCT2015-60m-C1068	34.6	14888
MedDCM-OCT2015-60m-C1073	35.6	14850
MedDCM-OCT2015-60m-C1084	34.2	14797
MedDCM-OCT2015-60m-C1118	34.03	14562
MedDCM-OCT2015-60m-C1127	37.09	14515
MedDCM-OCT2015-60m-C1132	34.25	14501
MedDCM-OCT2015-60m-C1158	31.67	14368
MedDCM-OCT2015-60m-C1180	36.57	14254
MedDCM-OCT2015-60m-C1184	32.59	14211
MedDCM-OCT2015-60m-C1228	36.08	13968
MedDCM-OCT2015-60m-C1234	32.49	13923
MedDCM-OCT2015-60m-C1268	36.31	13769
MedDCM-OCT2015-60m-C1353	34.65	13262
MedDCM-OCT2015-60m-C1423	31.83	12920
MedDCM-OCT2015-60m-C1469	36.84	12716
MedDCM-OCT2015-60m-C1541	34.48	12385
MedDCM-OCT2015-60m-C1586	36.69	12209
MedDCM-OCT2015-60m-C1637	32.94	12011
MedDCM-OCT2015-60m-C1648	38.46	11980
MedDCM-OCT2015-60m-C1652	35.53	11969
MedDCM-OCT2015-60m-C1819	33.74	11401
MedDCM-OCT2015-60m-C1867	38.5	11261
MedDCM-OCT2015-60m-C1951	32.24	11025
MedDCM-OCT2015-60m-C2034	34.39	10812
MedDCM-OCT2015-60m-C2075	36.34	10710
MedDCM-OCT2015-60m-C2185	32.1	10411
MedDCM-SEP2015HS-C12	30.85	163529
MedDCM-SEP2015HS-C17	33.92	152096
MedDCM-SEP2015HS-C71	35.97	81277
MedDCM-SEP2015HS-C72	33.54	81211
MedDCM-SEP2015HS-C74	31.98	80540
MedDCM-SEP2015HS-C115	33.49	68177
MedDCM-SEP2015HS-C126	37.4	65805
MedDCM-SEP2015HS-C127	30.07	65754
MedDCM-SEP2015HS-C149	37.49	61296
MedDCM-SEP2015HS-C173	33.15	57441
MedDCM-SEP2015HS-C191	38.06	54747
MedDCM-SEP2015HS-C197	35.4	53394
MedDCM-SEP2015HS-C219	31.77	50829
MedDCM-SEP2015HS-C230	33.09	49521
MedDCM-SEP2015HS-C235	35.84	48915
MedDCM-SEP2015HS-C243	37.33	48199
MedDCM-SEP2015HS-C265	32.64	46612
MedDCM-SEP2015HS-C284	36.96	44659
MedDCM-SEP2015HS-C287	32.09	44363
MedDCM-SEP2015HS-C293	39.28	43923
MedDCM-SEP2015HS-C297	32.71	43764
MedDCM-SEP2015HS-C326	32.42	41493
MedDCM-SEP2015HS-C364	39.12	39314
MedDCM-SEP2015HS-C369	33.27	39098
MedDCM-SEP2015HS-C381	29.74	38536
MedDCM-SEP2015HS-C390	34.04	38280
MedDCM-SEP2015HS-C394	37.55	38100
MedDCM-SEP2015HS-C397	32.18	38017
MedDCM-SEP2015HS-C415	46.83	37158
MedDCM-SEP2015HS-C420	35.73	36924
MedDCM-SEP2015HS-C471	33.58	34608
MedDCM-SEP2015HS-C481	36.25	34213
MedDCM-SEP2015HS-C501	35.53	33539
MedDCM-SEP2015HS-C531	29.56	32364
MedDCM-SEP2015HS-C610	34.24	30044
MedDCM-SEP2015HS-C666	31.82	28780
MedDCM-SEP2015HS-C670	30.65	28668
MedDCM-SEP2015HS-C676	36.79	28559
MedDCM-SEP2015HS-C705	34.47	27889
MedDCM-SEP2015HS-C710	36.28	27842
MedDCM-SEP2015HS-C711	31.12	27837
MedDCM-SEP2015HS-C720	31.49	27660
MedDCM-SEP2015HS-C783	35.66	26436
MedDCM-SEP2015HS-C854	36.74	25374
MedDCM-SEP2015HS-C896	33.35	24636
MedDCM-SEP2015HS-C907	32.61	24412
MedDCM-SEP2015HS-C932	29.01	24046
MedDCM-SEP2015HS-C955	37.38	23791
MedDCM-SEP2015HS-C997	29.57	23349
MedDCM-SEP2015HS-C1027	35.6	22951
MedDCM-SEP2015HS-C1058	36.08	22691
MedDCM-SEP2015HS-C1061	37.02	22660
MedDCM-SEP2015HS-C1076	33.68	22533
MedDCM-SEP2015HS-C1087	41.15	22316
MedDCM-SEP2015HS-C1089	30.44	22283
MedDCM-SEP2015HS-C1100	35.55	22201
MedDCM-SEP2015HS-C1166	32.25	21445
MedDCM-SEP2015HS-C1199	36.59	21104
MedDCM-SEP2015HS-C1235	35.08	20755
MedDCM-SEP2015HS-C1252	32.88	20564
MedDCM-SEP2015HS-C1265	35.01	20418
MedDCM-SEP2015HS-C1275	35.88	20364
MedDCM-SEP2015HS-C1287	38.18	20302
MedDCM-SEP2015HS-C1359	33.8	19617
MedDCM-SEP2015HS-C1400	36.11	19344
MedDCM-SEP2015HS-C1461	29.14	18848
MedDCM-SEP2015HS-C1485	30.39	18679
MedDCM-SEP2015HS-C1661	35.83	17567
MedDCM-SEP2015HS-C1698	31.05	17351
MedDCM-SEP2015HS-C1733	31.31	17126
MedDCM-SEP2015HS-C1854	34.13	16412
MedDCM-SEP2015HS-C1917	33.2	16121
MedDCM-SEP2015HS-C2093	37.18	15317
MedDCM-SEP2015HS-C2101	38.13	15285
MedDCM-SEP2015HS-C2109	34.29	15265
MedDCM-SEP2015HS-C2116	37.15	15250
MedDCM-SEP2015HS-C2126	34.34	15213
MedDCM-SEP2015HS-C2217	36.56	14925
MedDCM-SEP2015HS-C2221	36.5	14908
MedDCM-SEP2015HS-C2274	33.72	14684
MedDCM-SEP2015HS-C2289	29.98	14627
MedDCM-SEP2015HS-C2331	32.08	14475
MedDCM-SEP2015HS-C2368	36.25	14330
MedDCM-SEP2015HS-C2375	32.41	14309
MedDCM-SEP2015HS-C2376	33.86	14308
MedDCM-SEP2015HS-C2404	39.09	14201
MedDCM-SEP2015HS-C2407	31.83	14192
MedDCM-SEP2015HS-C2411	36.62	14177
MedDCM-SEP2015HS-C2416	39.48	14155
MedDCM-SEP2015HS-C2512	38.67	13837
MedDCM-SEP2015HS-C2654	33.82	13385
MedDCM-SEP2015HS-C2666	34.2	13353
MedDCM-SEP2015HS-C2695	33.89	13268
MedDCM-SEP2015HS-C2716	36.7	13227
MedDCM-SEP2015HS-C2736	33.38	13180
MedDCM-SEP2015HS-C2743	33.86	13169
MedDCM-SEP2015HS-C2776	35.74	13111
MedDCM-SEP2015HS-C2777	32.21	13109
MedDCM-SEP2015HS-C2787	34.88	13095
MedDCM-SEP2015HS-C2807	30.76	13058
MedDCM-SEP2015HS-C2843	39.19	12969
MedDCM-SEP2015HS-C2847	38.46	12957
MedDCM-SEP2015HS-C2861	31.15	12935
MedDCM-SEP2015HS-C2891	36.56	12866
MedDCM-SEP2015HS-C2979	36.53	12649
MedDCM-SEP2015HS-C3011	36.9	12563
MedDCM-SEP2015HS-C3032	36.7	12495
MedDCM-SEP2015HS-C3065	33.19	12442
MedDCM-SEP2015HS-C3106	36.49	12350
MedDCM-SEP2015HS-C3142	36.66	12286
MedDCM-SEP2015HS-C3172	43.88	12199
MedDCM-SEP2015HS-C3178	35.84	12189
MedDCM-SEP2015HS-C3185	34.29	12181
MedDCM-SEP2015HS-C3196	39.25	12163
MedDCM-SEP2015HS-C3266	39.49	12023
MedDCM-SEP2015HS-C3269	34.55	12021
MedDCM-SEP2015HS-C3276	36.43	12010
MedDCM-SEP2015HS-C3287	32.56	11990
MedDCM-SEP2015HS-C3434	30.71	11705
MedDCM-SEP2015HS-C3557	31.08	11475
MedDCM-SEP2015HS-C3566	38.09	11462
MedDCM-SEP2015HS-C3590	32.84	11420
MedDCM-SEP2015HS-C3635	33.27	11351
MedDCM-SEP2015HS-C3704	36.23	11201
MedDCM-SEP2015HS-C3826	37.28	11016
MedDCM-SEP2015HS-C4023	36.34	10693
MedDCM-SEP2015HS-C4026	40.7	10691
MedDCM-SEP2015HS-C4132	31.43	10524
MedDCM-SEP2015HS-C4154	33.36	10493
MedDCM-SEP2015HS-C4159	37.04	10490
MedDCM-SEP2015HS-C4163	35.33	10483
MedDCM-SEP2015HS-C4211	37.26	10420
MedDCM-SEP2015HS-C4282	35.75	10315
MedDCM-SEP2015HS-C4309	39.99	10277
MedDCM-SEP2015HS-C4423	36.54	10137
MedDCM-SEP2015HS-C4437	32.61	10117
MedDCM-SEP2015HS-C4491	45.82	10059
MedDCM-SEP2015HS-C4493	38.67	10055
Med-OCT2015-1000m-C521	40.24	20019
Med-OCT2015-1000m-C527	38.45	19899
Med-OCT2015-1000m-C706	34.2	16742
Med-OCT2015-1000m-C826	40.37	15503
Med-OCT2015-1000m-C1566	41.83	10933
Med-OCT2015-1000m-C1699	33.64	10339
Med-OCT2015-1000m-C1745	34.7	10198
Med-OCT2015-1000m-C1776	40.01	10102
Med-OCT2015-1000m-C1799	43.64	10019
Med-OCT2015-15m-C9	41.04	175282
Med-OCT2015-15m-C16	38.21	142663
Med-OCT2015-15m-C18	39.37	138459
Med-OCT2015-15m-C23	39.54	115765
Med-OCT2015-15m-C27	38.29	111585
Med-OCT2015-15m-C35	29.65	103346
Med-OCT2015-15m-C65	31.93	80390
Med-OCT2015-15m-C67	35.57	80341
Med-OCT2015-15m-C80	38.8	76109
Med-OCT2015-15m-C81	32.15	76070
Med-OCT2015-15m-C119	36.85	63337
Med-OCT2015-15m-C130	31.34	61881
Med-OCT2015-15m-C141	37.65	59724
Med-OCT2015-15m-C148	32.57	58094
Med-OCT2015-15m-C165	47.73	56255
Med-OCT2015-15m-C176	36.76	55585
Med-OCT2015-15m-C179	36.86	55096
Med-OCT2015-15m-C242	36.7	48142
Med-OCT2015-15m-C347	36.76	42072
Med-OCT2015-15m-C356	34.92	41737
Med-OCT2015-15m-C368	19.79	41427
Med-OCT2015-15m-C374	22.16	41099
Med-OCT2015-15m-C380	21.42	40744
Med-OCT2015-15m-C453	37.78	37311
Med-OCT2015-15m-C458	37.17	37185
Med-OCT2015-15m-C467	36.78	36932
Med-OCT2015-15m-C476	34.15	36547
Med-OCT2015-15m-C481	36.97	36322
Med-OCT2015-15m-C497	41.55	35522
Med-OCT2015-15m-C508	39.48	34924
Med-OCT2015-15m-C551	34.11	33781
Med-OCT2015-15m-C626	20.64	31487
Med-OCT2015-15m-C640	18.8	31071
Med-OCT2015-15m-C642	35.05	30980
Med-OCT2015-15m-C659	41.87	30655
Med-OCT2015-15m-C662	36.15	30619
Med-OCT2015-15m-C679	37.37	30237
Med-OCT2015-15m-C745	31.5	28824
Med-OCT2015-15m-C814	31.83	27757
Med-OCT2015-15m-C859	33.3	27240
Med-OCT2015-15m-C909	18.89	26474
Med-OCT2015-15m-C927	30.84	26099
Med-OCT2015-15m-C935	36.83	26018
Med-OCT2015-15m-C936	38.1	26012
Med-OCT2015-15m-C955	36.59	25504
Med-OCT2015-15m-C958	33.3	25463
Med-OCT2015-15m-C971	36.37	25338
Med-OCT2015-15m-C995	21.83	24878
Med-OCT2015-15m-C1000	33.48	24790
Med-OCT2015-15m-C1092	37.12	23615
Med-OCT2015-15m-C1122	36.68	23330
Med-OCT2015-15m-C1194	35.5	22625
Med-OCT2015-15m-C1277	18.84	21762
Med-OCT2015-15m-C1298	31.59	21559
Med-OCT2015-15m-C1342	36.36	21184
Med-OCT2015-15m-C1367	39.52	20921
Med-OCT2015-15m-C1448	47.76	20205
Med-OCT2015-15m-C1503	33.72	19821
Med-OCT2015-15m-C1609	36.51	18943
Med-OCT2015-15m-C1658	40.18	18628
Med-OCT2015-15m-C1694	35.37	18350
Med-OCT2015-15m-C1711	19.27	18232
Med-OCT2015-15m-C1837	39.57	17483
Med-OCT2015-15m-C1850	47.11	17386
Med-OCT2015-15m-C1882	32.58	17140
Med-OCT2015-15m-C1913	34.93	17017
Med-OCT2015-15m-C2034	40.42	16485
Med-OCT2015-15m-C2054	19.83	16413
Med-OCT2015-15m-C2059	42.04	16391
Med-OCT2015-15m-C2186	32.05	15758
Med-OCT2015-15m-C2441	35.05	14752
Med-OCT2015-15m-C2455	34.51	14687
Med-OCT2015-15m-C2523	34.42	14426
Med-OCT2015-15m-C2714	33.98	13823
Med-OCT2015-15m-C2718	47.74	13809
Med-OCT2015-15m-C2740	19.79	13754
Med-OCT2015-15m-C2754	48.17	13709
Med-OCT2015-15m-C2777	32.68	13637
Med-OCT2015-15m-C2814	37.15	13543
Med-OCT2015-15m-C2834	41.23	13506
Med-OCT2015-15m-C2886	31.62	13376
Med-OCT2015-15m-C2932	33.11	13258
Med-OCT2015-15m-C2936	30.68	13249
Med-OCT2015-15m-C2998	43.62	13098
Med-OCT2015-15m-C3011	36.88	13071
Med-OCT2015-15m-C3035	32.75	13021
Med-OCT2015-15m-C3059	37.49	12946
Med-OCT2015-15m-C3069	31	12920
Med-OCT2015-15m-C3103	39.82	12804
Med-OCT2015-15m-C3132	33.4	12729
Med-OCT2015-15m-C3177	21.4	12617
Med-OCT2015-15m-C3257	32.09	12415
Med-OCT2015-15m-C3378	31.65	12174
Med-OCT2015-15m-C3592	34.3	11677
Med-OCT2015-15m-C3603	35.83	11659
Med-OCT2015-15m-C3636	35.83	11597
Med-OCT2015-15m-C3638	33.05	11596
Med-OCT2015-15m-C3680	32.24	11512
Med-OCT2015-15m-C3693	31.81	11480
Med-OCT2015-15m-C3727	31.69	11426
Med-OCT2015-15m-C3733	32.89	11405
Med-OCT2015-15m-C3735	31.75	11403
Med-OCT2015-15m-C3753	40.3	11374
Med-OCT2015-15m-C3808	33.49	11285
Med-OCT2015-15m-C3819	34.53	11254
Med-OCT2015-15m-C3834	51.53	11230
Med-OCT2015-15m-C3915	39.35	11063
Med-OCT2015-15m-C3920	20.26	11053
Med-OCT2015-15m-C3985	31.71	10915
Med-OCT2015-15m-C4058	31.31	10806
Med-OCT2015-15m-C4158	19.24	10665
Med-OCT2015-15m-C4206	38.07	10596
Med-OCT2015-15m-C4518	33.49	10166
Med-OCT2015-15m-C4536	32.04	10146
Med-OCT2015-15m-C4563	36.19	10107
Med-OCT2015-15m-C4608	45.8	10045
Med-OCT2015-15m-C4631	35.12	10018
Med-OCT2015-2000m-C282	48.08	59668
Med-OCT2015-2000m-C702	38.43	34847
Med-OCT2015-2000m-C844	39.81	30778
Med-OCT2015-2000m-C859	27.68	30521
Med-OCT2015-2000m-C1031	40.9	27013
Med-OCT2015-2000m-C1132	39.69	25404
Med-OCT2015-2000m-C2045	40.66	17163
Med-OCT2015-2000m-C2607	39.89	14634
Med-OCT2015-30m-C1	42.58	164871
Med-OCT2015-30m-C18	31.94	80382
Med-OCT2015-30m-C29	41.13	70200
Med-OCT2015-30m-C33	34.23	64170
Med-OCT2015-30m-C34	32.47	63844
Med-OCT2015-30m-C35	37.32	62840
Med-OCT2015-30m-C42	39.86	57593
Med-OCT2015-30m-C50	33.85	55335
Med-OCT2015-30m-C54	38.49	53935
Med-OCT2015-30m-C67	35.67	50242
Med-OCT2015-30m-C69	39.8	49973
Med-OCT2015-30m-C72	33.08	49617
Med-OCT2015-30m-C74	40.85	48962
Med-OCT2015-30m-C76	41	48762
Med-OCT2015-30m-C82	39.22	46823
Med-OCT2015-30m-C86	33.82	45227
Med-OCT2015-30m-C91	36.14	44225
Med-OCT2015-30m-C98	38.93	42233
Med-OCT2015-30m-C107	36.33	40708
Med-OCT2015-30m-C116	34.07	39525
Med-OCT2015-30m-C129	35.09	37918
Med-OCT2015-30m-C141	37.17	37185
Med-OCT2015-30m-C153	33.1	35645
Med-OCT2015-30m-C159	36.43	34870
Med-OCT2015-30m-C167	38.62	33936
Med-OCT2015-30m-C172	34.25	33322
Med-OCT2015-30m-C178	35.39	32944
Med-OCT2015-30m-C180	33.55	32841
Med-OCT2015-30m-C184	37.01	32594
Med-OCT2015-30m-C189	34.01	32421
Med-OCT2015-30m-C214	41.42	30596
Med-OCT2015-30m-C241	34.16	28372
Med-OCT2015-30m-C246	35.85	28125
Med-OCT2015-30m-C252	37.11	27794
Med-OCT2015-30m-C255	32.98	27362
Med-OCT2015-30m-C265	33.92	26969
Med-OCT2015-30m-C267	31.78	26877
Med-OCT2015-30m-C283	32.8	26204
Med-OCT2015-30m-C299	40.7	25660
Med-OCT2015-30m-C305	33.79	25408
Med-OCT2015-30m-C320	33.77	24971
Med-OCT2015-30m-C322	33.89	24819
Med-OCT2015-30m-C330	30.5	24662
Med-OCT2015-30m-C331	34.41	24654
Med-OCT2015-30m-C353	33.99	23932
Med-OCT2015-30m-C354	39.06	23927
Med-OCT2015-30m-C363	40.02	23638
Med-OCT2015-30m-C366	31.07	23546
Med-OCT2015-30m-C370	40.73	23408
Med-OCT2015-30m-C378	36.12	23115
Med-OCT2015-30m-C386	33.32	22950
Med-OCT2015-30m-C388	32.77	22921
Med-OCT2015-30m-C393	32.95	22808
Med-OCT2015-30m-C403	33.18	22559
Med-OCT2015-30m-C410	38.94	22477
Med-OCT2015-30m-C424	34.82	22176
Med-OCT2015-30m-C431	32.48	21956
Med-OCT2015-30m-C443	30.62	21766
Med-OCT2015-30m-C451	31.17	21629
Med-OCT2015-30m-C455	31.67	21589
Med-OCT2015-30m-C466	31.36	21240
Med-OCT2015-30m-C468	38.51	21105
Med-OCT2015-30m-C494	35.21	20578
Med-OCT2015-30m-C498	36.15	20502
Med-OCT2015-30m-C506	40.79	20304
Med-OCT2015-30m-C546	33.44	19639
Med-OCT2015-30m-C559	32.21	19436
Med-OCT2015-30m-C565	34.56	19391
Med-OCT2015-30m-C583	32.14	19075
Med-OCT2015-30m-C585	34.27	19061
Med-OCT2015-30m-C599	32.34	18943
Med-OCT2015-30m-C623	36.57	18728
Med-OCT2015-30m-C642	34.94	18493
Med-OCT2015-30m-C646	32.75	18422
Med-OCT2015-30m-C670	33.95	18050
Med-OCT2015-30m-C672	34.16	18028
Med-OCT2015-30m-C675	33.63	17998
Med-OCT2015-30m-C689	35.64	17865
Med-OCT2015-30m-C698	37.67	17779
Med-OCT2015-30m-C746	35.28	17362
Med-OCT2015-30m-C753	35.48	17275
Med-OCT2015-30m-C766	39.67	17077
Med-OCT2015-30m-C794	31.48	16760
Med-OCT2015-30m-C831	34.67	16462
Med-OCT2015-30m-C843	34.6	16260
Med-OCT2015-30m-C852	36.55	16166
Med-OCT2015-30m-C858	34.68	16124
Med-OCT2015-30m-C870	34.33	16021
Med-OCT2015-30m-C888	34.04	15850
Med-OCT2015-30m-C903	35.63	15677
Med-OCT2015-30m-C911	37	15593
Med-OCT2015-30m-C930	33.5	15359
Med-OCT2015-30m-C943	37.06	15236
Med-OCT2015-30m-C963	32.01	15122
Med-OCT2015-30m-C974	35.79	15056
Med-OCT2015-30m-C982	35.07	14958
Med-OCT2015-30m-C989	34.66	14940
Med-OCT2015-30m-C1001	41.05	14836
Med-OCT2015-30m-C1053	36.66	14468
Med-OCT2015-30m-C1063	37.27	14404
Med-OCT2015-30m-C1065	35.47	14386
Med-OCT2015-30m-C1074	29.69	14342
Med-OCT2015-30m-C1083	35.91	14273
Med-OCT2015-30m-C1116	37.81	14080
Med-OCT2015-30m-C1129	31.6	14027
Med-OCT2015-30m-C1186	34.29	13629
Med-OCT2015-30m-C1187	31.96	13628
Med-OCT2015-30m-C1195	36.05	13598
Med-OCT2015-30m-C1205	31.59	13543
Med-OCT2015-30m-C1228	38.55	13429
Med-OCT2015-30m-C1243	31.89	13341
Med-OCT2015-30m-C1255	40.17	13275
Med-OCT2015-30m-C1257	34.64	13262
Med-OCT2015-30m-C1265	39.45	13217
Med-OCT2015-30m-C1268	34.65	13202
Med-OCT2015-30m-C1281	32.53	13151
Med-OCT2015-30m-C1286	36.11	13129
Med-OCT2015-30m-C1352	32.24	12824
Med-OCT2015-30m-C1353	34.58	12821
Med-OCT2015-30m-C1360	35.77	12768
Med-OCT2015-30m-C1368	31.64	12739
Med-OCT2015-30m-C1386	34.08	12647
Med-OCT2015-30m-C1387	33.4	12646
Med-OCT2015-30m-C1391	34	12623
Med-OCT2015-30m-C1444	33.98	12423
Med-OCT2015-30m-C1507	29.8	12183
Med-OCT2015-30m-C1511	30.36	12164
Med-OCT2015-30m-C1513	33.95	12141
Med-OCT2015-30m-C1515	41.41	12141
Med-OCT2015-30m-C1540	37.38	12032
Med-OCT2015-30m-C1542	31.51	12025
Med-OCT2015-30m-C1592	36.51	11839
Med-OCT2015-30m-C1596	41.67	11828
Med-OCT2015-30m-C1629	37.34	11710
Med-OCT2015-30m-C1634	38.99	11699
Med-OCT2015-30m-C1645	35.33	11660
Med-OCT2015-30m-C1651	35.71	11649
Med-OCT2015-30m-C1656	37.61	11613
Med-OCT2015-30m-C1659	34.6	11603
Med-OCT2015-30m-C1672	32.14	11559
Med-OCT2015-30m-C1689	36.06	11478
Med-OCT2015-30m-C1696	39.17	11445
Med-OCT2015-30m-C1721	40.29	11374
Med-OCT2015-30m-C1728	35.72	11356
Med-OCT2015-30m-C1732	37.18	11349
Med-OCT2015-30m-C1734	30.52	11339
Med-OCT2015-30m-C1736	33.88	11331
Med-OCT2015-30m-C1744	37.55	11309
Med-OCT2015-30m-C1755	31.17	11259
Med-OCT2015-30m-C1820	36.65	11030
Med-OCT2015-30m-C1832	34.37	10996
Med-OCT2015-30m-C1843	35.44	10969
Med-OCT2015-30m-C1845	40.3	10955
Med-OCT2015-30m-C1863	40.39	10889
Med-OCT2015-30m-C1877	38.06	10851
Med-OCT2015-30m-C1898	33.21	10799
Med-OCT2015-30m-C1974	33.39	10622
Med-OCT2015-30m-C2021	31.9	10473
Med-OCT2015-30m-C2092	38.81	10268
Med-OCT2015-30m-C2110	34.83	10219
Med-OCT2015-30m-C2128	32.58	10177
Med-OCT2015-30m-C2151	35.2	10118
Med-OCT2015-30m-C2176	33.09	10056
Med-OCT2015-30m-C2181	33.18	10047
Med-OCT2015-30m-C2194	25.06	10023
Med-OCT2015-30m-C2195	32.05	10020
Med-OCT2015-75m-C5	31.24	148601
Med-OCT2015-75m-C9	30.7	127348
Med-OCT2015-75m-C37	42.46	82209
Med-OCT2015-75m-C52	34.42	71782
Med-OCT2015-75m-C78	34.03	60245
Med-OCT2015-75m-C89	34.81	55505
Med-OCT2015-75m-C109	31.76	50891
Med-OCT2015-75m-C131	36.55	46174
Med-OCT2015-75m-C197	36.23	39142
Med-OCT2015-75m-C206	30.43	38282
Med-OCT2015-75m-C208	29.65	38194
Med-OCT2015-75m-C223	31.54	36891
Med-OCT2015-75m-C256	46.27	34778
Med-OCT2015-75m-C288	29.5	32966
Med-OCT2015-75m-C304	30.42	32170
Med-OCT2015-75m-C308	35.24	32134
Med-OCT2015-75m-C360	31.62	29026
Med-OCT2015-75m-C375	35.91	28395
Med-OCT2015-75m-C455	36.99	25285
Med-OCT2015-75m-C501	42.53	23990
Med-OCT2015-75m-C520	37.22	23425
Med-OCT2015-75m-C536	35.01	23114
Med-OCT2015-75m-C542	36.64	23049
Med-OCT2015-75m-C678	36.11	20485
Med-OCT2015-75m-C754	39.02	19466
Med-OCT2015-75m-C788	36.12	19036
Med-OCT2015-75m-C794	34.88	18900
Med-OCT2015-75m-C800	35.07	18821
Med-OCT2015-75m-C904	38.51	17656
Med-OCT2015-75m-C912	29.37	17574
Med-OCT2015-75m-C923	32.25	17433
Med-OCT2015-75m-C947	36.08	17163
Med-OCT2015-75m-C1033	33.47	16357
Med-OCT2015-75m-C1142	37.1	15610
Med-OCT2015-75m-C1262	35.55	14974
Med-OCT2015-75m-C1263	34.73	14958
Med-OCT2015-75m-C1270	33.92	14937
Med-OCT2015-75m-C1324	33.05	14643
Med-OCT2015-75m-C1351	25.77	14499
Med-OCT2015-75m-C1425	35.37	14073
Med-OCT2015-75m-C1491	30.92	13742
Med-OCT2015-75m-C1497	33.81	13722
Med-OCT2015-75m-C1591	35.59	13350
Med-OCT2015-75m-C1592	30.61	13349
Med-OCT2015-75m-C1623	33.62	13236
Med-OCT2015-75m-C1685	34.41	12974
Med-OCT2015-75m-C1697	36.61	12939
Med-OCT2015-75m-C1711	33.88	12888
Med-OCT2015-75m-C1740	32.42	12781
Med-OCT2015-75m-C1955	35.83	12029
Med-OCT2015-75m-C1971	32.66	11970
Med-OCT2015-75m-C2007	34.12	11863
Med-OCT2015-75m-C2023	37.92	11797
Med-OCT2015-75m-C2049	31.76	11741
Med-OCT2015-75m-C2083	35.97	11640
Med-OCT2015-75m-C2137	33.69	11493
Med-OCT2015-75m-C2188	35.19	11358
Med-OCT2015-75m-C2226	32.21	11259
Med-OCT2015-75m-C2390	37.19	10796
Med-OCT2015-75m-C2539	35.29	10484
Med-OCT2015-75m-C2568	36.6	10414
Med-OCT2015-75m-C2655	39.81	10256
Med-OCT2015-90m-C14	30.17	80879
Med-OCT2015-90m-C27	36.72	69009
Med-OCT2015-90m-C56	32.27	54113
Med-OCT2015-90m-C66	30.68	51674
Med-OCT2015-90m-C75	36.92	49962
Med-OCT2015-90m-C120	29.34	42435
Med-OCT2015-90m-C149	34.92	39168
Med-OCT2015-90m-C191	29.07	35290
Med-OCT2015-90m-C223	34.44	33386
Med-OCT2015-90m-C252	29.61	31650
Med-OCT2015-90m-C291	32.38	29595
Med-OCT2015-90m-C305	29.81	29283
Med-OCT2015-90m-C327	35.62	28342
Med-OCT2015-90m-C364	36.34	27199
Med-OCT2015-90m-C430	33.91	25043
Med-OCT2015-90m-C561	31.55	22051
Med-OCT2015-90m-C566	31.25	21847
Med-OCT2015-90m-C646	33.7	20475
Med-OCT2015-90m-C682	33.72	19692
Med-OCT2015-90m-C703	34.82	19423
Med-OCT2015-90m-C902	35.96	17340
Med-OCT2015-90m-C911	33.48	17250
Med-OCT2015-90m-C950	28.67	16776
Med-OCT2015-90m-C979	36.23	16576
Med-OCT2015-90m-C1221	35.99	14629
Med-OCT2015-90m-C1256	34.84	14448
Med-OCT2015-90m-C1275	35.44	14316
Med-OCT2015-90m-C1279	36.36	14308
Med-OCT2015-90m-C1283	31.66	14280
Med-OCT2015-90m-C1292	36.78	14213
Med-OCT2015-90m-C1337	36.89	13994
Med-OCT2015-90m-C1362	36.71	13878
Med-OCT2015-90m-C1459	35.93	13377
Med-OCT2015-90m-C1522	34.88	13095
Med-OCT2015-90m-C1553	39	12983
Med-OCT2015-90m-C1564	37.86	12938
Med-OCT2015-90m-C1736	35.64	12243
Med-OCT2015-90m-C1916	36.64	11604
Med-OCT2015-90m-C2055	36.48	11212
Med-OCT2015-90m-C2064	32.78	11190
Med-OCT2015-90m-C2087	36.44	11135
Med-OCT2015-90m-C2118	35.39	11047
Med-OCT2015-90m-C2402	35.57	10305
Med-OCT2015-90m-C2409	34.12	10292
Med-OCT2015-90m-C2437	35.22	10221
Med-OCT2015-90m-C2468	35.04	10162
sept14-15m-C12	32.48	142788
sept14-15m-C36	35.53	93924
sept14-15m-C65	37.58	76344
sept14-15m-C86	33.57	68914
sept14-15m-C115	31.16	60234
sept14-15m-C116	36.89	59999
sept14-15m-C134	41.39	56261
sept14-15m-C135	47.51	56252
sept14-15m-C141	41.83	55257
sept14-15m-C146	37.6	53516
sept14-15m-C155	34.83	52069
sept14-15m-C174	37.76	48322
sept14-15m-C220	36.91	43568
sept14-15m-C245	25.65	40851
sept14-15m-C280	37.04	38218
sept14-15m-C286	39.67	37888
sept14-15m-C307	32.38	36519
sept14-15m-C341	36.41	34685
sept14-15m-C363	44.63	33348
sept14-15m-C401	35.29	31806
sept14-15m-C420	40.62	31378
sept14-15m-C425	38.28	31188
sept14-15m-C457	44.12	29836
sept14-15m-C470	38.67	29300
sept14-15m-C508	33.64	27407
sept14-15m-C511	42.63	27372
sept14-15m-C564	38.09	26023
sept14-15m-C595	37.66	25404
sept14-15m-C636	30.26	24645
sept14-15m-C675	36.11	24013
sept14-15m-C695	37.12	23615
sept14-15m-C700	40.73	23535
sept14-15m-C710	38.93	23361
sept14-15m-C908	32.91	20105
sept14-15m-C918	35.3	20012
sept14-15m-C941	37.19	19833
sept14-15m-C989	34.23	19360
sept14-15m-C1007	39.28	19159
sept14-15m-C1034	33.5	18894
sept14-15m-C1040	34.49	18810
sept14-15m-C1042	35.31	18806
sept14-15m-C1068	39.96	18595
sept14-15m-C1084	34.52	18449
sept14-15m-C1086	32.88	18440
sept14-15m-C1087	35.57	18431
sept14-15m-C1091	34.28	18412
sept14-15m-C1115	39.45	18243
sept14-15m-C1246	32.81	17185
sept14-15m-C1334	36.54	16385
sept14-15m-C1360	43.53	16129
sept14-15m-C1361	35.51	16119
sept14-15m-C1512	31.4	15171
sept14-15m-C1514	39	15148
sept14-15m-C1518	42.04	15122
sept14-15m-C1558	34.27	14908
sept14-15m-C1569	32.68	14829
sept14-15m-C1667	40.89	14244
sept14-15m-C1691	40.28	14128
sept14-15m-C1715	33.17	14026
sept14-15m-C1723	40.92	13994
sept14-15m-C1789	41.7	13713
sept14-15m-C1790	31.67	13712
sept14-15m-C1825	41.98	13513
sept14-15m-C1827	33.46	13496
sept14-15m-C1901	47.32	13183
sept14-15m-C1987	36.29	12867
sept14-15m-C1992	36.51	12853
sept14-15m-C2001	39.17	12816
sept14-15m-C2006	33.57	12805
sept14-15m-C2020	38.14	12752
sept14-15m-C2029	47.47	12725
sept14-15m-C2056	39.65	12642
sept14-15m-C2116	36.39	12408
sept14-15m-C2143	37.37	12327
sept14-15m-C2199	40.19	12172
sept14-15m-C2309	34.43	11747
sept14-15m-C2412	33.33	11447
sept14-15m-C2446	36.69	11354
sept14-15m-C2482	42.42	11275
sept14-15m-C2495	32.94	11241
sept14-15m-C2592	45.5	10966
sept14-15m-C2665	41.65	10773
sept14-15m-C2668	41.45	10762
sept14-15m-C2737	34.14	10614
sept14-15m-C2837	32.26	10363
sept14-15m-C2890	32.07	10254
sept14-15m-C3007	35.08	10034
sept14-30m-C1	42.26	188425
sept14-30m-C18	35.18	105657
sept14-30m-C31	34.76	90389
sept14-30m-C47	37.65	79799
sept14-30m-C67	34.46	67382
sept14-30m-C72	36.85	63313
sept14-30m-C87	39.28	57089
sept14-30m-C94	37.15	54438
sept14-30m-C100	37.26	53307
sept14-30m-C124	32.77	48794
sept14-30m-C174	37.58	41493
sept14-30m-C189	37.11	39464
sept14-30m-C199	36.72	37947
sept14-30m-C203	37.35	37798
sept14-30m-C212	47.58	36623
sept14-30m-C223	34.52	35769
sept14-30m-C226	38.83	35275
sept14-30m-C251	37.14	34105
sept14-30m-C257	34.93	33624
sept14-30m-C277	37.83	32657
sept14-30m-C280	34.98	32458
sept14-30m-C293	31.43	31644
sept14-30m-C298	33.64	31312
sept14-30m-C326	37.33	30008
sept14-30m-C355	31.03	28739
sept14-30m-C388	33.52	27578
sept14-30m-C394	35.63	27318
sept14-30m-C422	33.57	26193
sept14-30m-C449	34.51	25045
sept14-30m-C454	39.39	24797
sept14-30m-C500	35.83	23128
sept14-30m-C507	40.88	22945
sept14-30m-C511	41.04	22876
sept14-30m-C513	33.65	22751
sept14-30m-C515	35.32	22719
sept14-30m-C516	36.52	22655
sept14-30m-C530	39.09	22250
sept14-30m-C533	35.27	22191
sept14-30m-C560	35.04	21638
sept14-30m-C566	32.94	21514
sept14-30m-C579	33.47	21176
sept14-30m-C629	33.7	20262
sept14-30m-C649	33.35	20002
sept14-30m-C654	34.29	19937
sept14-30m-C702	32.86	19189
sept14-30m-C709	36.92	19074
sept14-30m-C720	36.17	18909
sept14-30m-C732	34.01	18740
sept14-30m-C736	34.28	18721
sept14-30m-C741	38.79	18633
sept14-30m-C772	34.86	18169
sept14-30m-C780	32.75	18008
sept14-30m-C823	37.78	17544
sept14-30m-C858	33.63	17138
sept14-30m-C883	36.77	16750
sept14-30m-C886	34.18	16742
sept14-30m-C946	37.73	16080
sept14-30m-C961	34.91	15986
sept14-30m-C979	35.12	15802
sept14-30m-C986	38.74	15719
sept14-30m-C990	31.78	15685
sept14-30m-C1117	41.76	14637
sept14-30m-C1120	39.65	14603
sept14-30m-C1129	39.92	14481
sept14-30m-C1140	39.49	14369
sept14-30m-C1190	34.92	14037
sept14-30m-C1193	36.1	14024
sept14-30m-C1230	42.9	13733
sept14-30m-C1233	32.77	13712
sept14-30m-C1234	35.66	13675
sept14-30m-C1260	38.57	13457
sept14-30m-C1272	35.19	13396
sept14-30m-C1294	32.79	13281
sept14-30m-C1358	33.6	12839
sept14-30m-C1457	34.38	12416
sept14-30m-C1462	33.95	12406
sept14-30m-C1474	39.88	12320
sept14-30m-C1479	32.62	12268
sept14-30m-C1513	32.89	12113
sept14-30m-C1537	35.85	11995
sept14-30m-C1577	33.49	11789
sept14-30m-C1641	32.39	11547
sept14-30m-C1647	39.23	11535
sept14-30m-C1648	42.64	11523
sept14-30m-C1672	36.25	11421
sept14-30m-C1685	37.03	11382
sept14-30m-C1689	42.72	11366
sept14-30m-C1693	36.82	11339
sept14-30m-C1700	38.8	11313
sept14-30m-C1707	33.98	11295
sept14-30m-C1708	40.07	11293
sept14-30m-C1734	32.1	11179
sept14-30m-C1754	37.09	11104
sept14-30m-C1771	34.38	11037
sept14-30m-C1825	37.4	10883
sept14-30m-C1832	35.29	10860
sept14-30m-C1835	45.45	10833
sept14-30m-C1849	30.98	10798
sept14-30m-C2032	29.54	10175
sept14-30m-C2048	32.84	10137
sept14-30m-C2084	37.85	10002
sept14-60m-C2	37.71	196733
sept14-60m-C17	39.52	88864
sept14-60m-C23	33.31	79181
sept14-60m-C30	42.8	74075
sept14-60m-C34	41.67	72345
sept14-60m-C70	40.01	51688
sept14-60m-C73	36.73	50070
sept14-60m-C90	42.48	46249
sept14-60m-C94	38.77	45846
sept14-60m-C123	42.79	41065
sept14-60m-C124	35.84	40894
sept14-60m-C127	34.07	40771
sept14-60m-C130	34.56	40506
sept14-60m-C140	33.14	39830
sept14-60m-C159	34.51	38011
sept14-60m-C173	37.48	36445
sept14-60m-C177	38.7	36074
sept14-60m-C203	37.18	34406
sept14-60m-C222	37.81	32408
sept14-60m-C235	39.09	31353
sept14-60m-C255	37.64	30731
sept14-60m-C262	34.49	30297
sept14-60m-C263	41.83	30286
sept14-60m-C278	36.71	29520
sept14-60m-C320	35.29	27038
sept14-60m-C337	42.47	26504
sept14-60m-C339	40.04	26408
sept14-60m-C341	40.13	26367
sept14-60m-C380	42.53	24991
sept14-60m-C395	31.27	24601
sept14-60m-C398	33.46	24455
sept14-60m-C403	35.16	24331
sept14-60m-C407	33.63	24202
sept14-60m-C417	35.74	23969
sept14-60m-C433	32.79	23467
sept14-60m-C439	32.82	23360
sept14-60m-C450	35.29	22965
sept14-60m-C459	32.42	22684
sept14-60m-C465	31.8	22562
sept14-60m-C471	38.97	22394
sept14-60m-C472	38.74	22362
sept14-60m-C535	34.77	20477
sept14-60m-C543	34.96	20338
sept14-60m-C546	33.1	20264
sept14-60m-C551	34.97	20193
sept14-60m-C607	30.37	19236
sept14-60m-C613	33.05	19159
sept14-60m-C622	43.29	18994
sept14-60m-C662	45.34	18405
sept14-60m-C669	32.62	18337
sept14-60m-C670	41.79	18326
sept14-60m-C688	31.58	18144
sept14-60m-C697	35.89	17973
sept14-60m-C701	36.05	17955
sept14-60m-C723	30.86	17736
sept14-60m-C737	35.95	17629
sept14-60m-C765	35.28	17362
sept14-60m-C773	41.06	17268
sept14-60m-C792	32.8	17081
sept14-60m-C812	30.84	16841
sept14-60m-C832	39.87	16632
sept14-60m-C880	34.94	16144
sept14-60m-C882	34.47	16129
sept14-60m-C892	45.21	16015
sept14-60m-C899	33.76	15973
sept14-60m-C912	42.5	15817
sept14-60m-C913	36.3	15813
sept14-60m-C919	36.69	15776
sept14-60m-C945	43.66	15513
sept14-60m-C952	41.42	15440
sept14-60m-C962	34.13	15341
sept14-60m-C973	33.54	15287
sept14-60m-C980	42.05	15171
sept14-60m-C1002	35.77	14970
sept14-60m-C1024	31.29	14661
sept14-60m-C1035	39.67	14591
sept14-60m-C1053	37.55	14467
sept14-60m-C1087	39.14	14158
sept14-60m-C1126	37.18	13823
sept14-60m-C1160	34.26	13601
sept14-60m-C1184	31.11	13441
sept14-60m-C1194	32.68	13393
sept14-60m-C1224	36.97	13135
sept14-60m-C1248	32.94	12966
sept14-60m-C1262	32.48	12874
sept14-60m-C1311	30.55	12627
sept14-60m-C1333	35.11	12523
sept14-60m-C1352	32.8	12425
sept14-60m-C1383	39.69	12274
sept14-60m-C1392	36.43	12244
sept14-60m-C1432	36.44	11966
sept14-60m-C1458	48.02	11849
sept14-60m-C1460	31.29	11838
sept14-60m-C1515	40.42	11569
sept14-60m-C1528	43.47	11506
sept14-60m-C1554	40.99	11382
sept14-60m-C1555	37.03	11382
sept14-60m-C1569	33.13	11324
sept14-60m-C1571	39.72	11313
sept14-60m-C1603	37.33	11199
sept14-60m-C1646	43.38	11071
sept14-60m-C1677	36.53	10904
sept14-60m-C1712	37.45	10749
sept14-60m-C1752	43.59	10621
sept14-60m-C1806	42.15	10413
sept14-60m-C1847	33.29	10264
sept14-60m-C1868	39.38	10217
sept14-60m-C1878	32.27	10203
sept14-60m-C1911	35.49	10100
sept14-60m-C1921	27.95	10078
Winter14-20m5u-C41	43.96	33843
Winter14-20m5u-C42	49.37	33758
Winter14-20m5u-C76	51.39	26890
Winter14-20m5u-C85	33.66	25034
Winter14-20m5u-C106	39.94	22427
Winter14-20m5u-C107	36.53	22383
Winter14-20m5u-C216	37.99	14903
Winter14-20m5u-C242	41.98	13977
Winter14-20m5u-C264	35.16	13249
Winter14-20m5u-C273	35.56	13010
Winter14-20m5u-C325	40.65	11684
Winter14-20m5u-C411	37.28	10262
Winter14-80m-C55	44.33	45359
Winter14-80m-C86	49.43	37175
Winter14-80m-C112	32.32	33144
Winter14-80m-C125	40.69	30643
Winter14-80m-C192	36.32	24408
Winter14-80m-C287	41.61	19710
Winter14-80m-C317	41.62	18792
Winter14-80m-C493	41.47	14251
Winter14-80m-C631	36.86	12302
Winter14-80m-C696	42.47	11553
Winter14-80m-C706	42.47	11377
Winter14-80m-C826	40.12	10365
Winter14-80m-C831	35.62	10331
Winter14-coastal-C215	41.02	21997
Winter14-coastal-C242	35.04	20746
Winter14-coastal-C709	42.66	11281
Winter14-coastal-C743	42.77	10951
Winter14-coastal-C753	38.4	10875
Winter14-coastal-C769	35.92	10718
Winter14-coastal-C785	34.2	10602
Winter14-coastal-C866	42.57	10043
